# Supplementary material
Source: PubMed Central journal article supplement (PMC4651298)
Supplement: 10-1055-s-0035-1558120-sup_gf976.pdf [file 10-1055-s-0035-1558120-sup_gf976.pdf]

# Uterine Sarkome. Leitlinie der DGGG (S2k-Level, AWMF-Registernummer 015/074, August 2015)

Sarcoma of the Uterus. Guideline of the DGGG (S2k-Level, AWMF Registry No. 015/074, August 2015)

## Autoren

D. Denschlag<sup>1</sup>, F. C. Thiel<sup>2</sup>, S. Ackermann<sup>3</sup>, P. Harter<sup>4</sup>, I. Juhasz-Boess<sup>5</sup>, P. Mallmann<sup>6</sup>, H.-G. Strauss<sup>7</sup>, U. Ullrich<sup>8</sup>, L.-C. Horn<sup>9</sup>, D. Schmidt<sup>10</sup>, D. Vordermark<sup>11</sup>, T. Vogl<sup>12</sup>, P. Reichardt<sup>13</sup>, P. Gaß<sup>14</sup>, M. Gebhardt<sup>15</sup>, M. W. Beckmann<sup>14</sup>

## Institute

Die Institutsangaben sind am Ende des Beitrags gelistet.

## Schlüsselwörter

- uterine Sarkome
- Leitlinie
- Leiomyosarkom
- endometriale Stromasarkome
- Karzinosarkom

## Key words

- uterine sarcoma
- guideline
- leiomyosarcoma
- endometrial stromal sarcoma
- carcinosarcoma

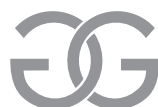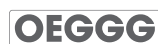

**gynécologie  
suisse**

## Bibliografie

**DOI** <http://dx.doi.org/10.1055/s-0035-1558120>  
Geburtsh Frauenheilk 2015; 75:  
1–15 © Georg Thieme  
Verlag KG Stuttgart · New York ·  
ISSN 0016-5751

## Korrespondenzadresse

**Prof. Dr. med.  
Dominik Denschlag**  
Hochtaunus-Klinik-gGmbH  
Zeppelinstraße 20  
61352 Bad Homburg  
dominik.denschlag@  
hochtaunus-kliniken.de

## Zusammenfassung

**Ziel:** Offizielle Leitlinie, publiziert und koordiniert von der Deutschen Gesellschaft für Gynäkologie und Geburtshilfe (DGGG). Aufgrund ihrer Seltenheit und heterogenen Histopathologie stellen uterine Sarkome eine Herausforderung bzgl. des klinischen Managements dar und bedürfen von daher einem multidisziplinären Ansatz. Nach unserem Kenntnisstand existieren bis dato keine verbindlichen, evidenzbasierten Empfehlungen bzgl. des angemessenen Managements dieser heterogenen Tumore.

**Methoden:** Die vorliegende S2k-Leitlinie ist das Ergebnis der Arbeit eines repräsentativen interdisziplinären Experten-Komitees, welches im Auftrag der Leitlinienkommission der DGGG eine systematische Literaturrecherche zum Thema Uterine Sarkome durchgeführt hat. Mitglieder der beteiligten Fachgesellschaften entwickelten in einem strukturierten Prozess einen formalen Konsensus.

**Empfehlungen:** 1. Die Inzidenz und histopathologische Klassifikationen von uterinen Sarkomen. 2. Die klinische Symptomatik, Diagnostik und Stadieneinteilung von uterinen Sarkomen. 3. Das Management von Leiomyosarkomen. 4. Das Management von endometrialen Stromasarkomen und undifferenzierten uterinen Sarkomen. 5. Das Management von Adenosarkomen als auch Karzinosarkomen. 6. Das Management von morcellierten uterinen Sarkomen

## Abstract

**Purpose:** Official guideline published and coordinated by the German Society of Gynecology and Obstetrics (DGGG). Due to their rarity and their heterogeneous histopathology uterine sarcomas remain challenging tumors to manage and need a multidisciplinary approach. To our knowledge so far there is no evidence-based guideline on the appropriate management of these heterogeneous tumors.

**Methods:** This S2k-guideline is the work of an representative committee of experts from a variety of different professions who were commissioned by the DGGG to carry out a systematic literature review of uterine sarcoma. Members of the participating scientific societies developed a structured consensus in a formal procedure.

**Recommendations:** 1. The incidence and histopathologic classification of uterine sarcoma. 2. The clinical manifestations, diagnosis and staging of uterine sarcoma. 3. The management of leiomyosarcoma. 4. The management of endometrial stromal sarcoma and undifferentiated uterine sarcoma. 5. The management of adenosarcoma as well as carcinosarcomas. 6. The management of morcellated uterine sarcoma

## Leitlinieninformation

### Leitlinienprogramm der DGGG, OEGGG und SGGG

Informationen hierzu finden Sie am Ende der Leitlinie.

## Zitierweise

Sarcoma of the uterus. Guideline of the DGGG (S2k-Level, AWMF Registry No. 015/074, August 2015). Geburtsh Frauenheilkunde 2015; 75: 1028–1042

Tab. 1 Autoren.

| Autor/in<br>Mandatsträger/in                 | DGGG-Arbeitsgemeinschaft/<br>Fachgesellschaft/Organisation/Verein |
|----------------------------------------------|-------------------------------------------------------------------|
| <b>koordinierender Leitlinienautor:</b>      |                                                                   |
| Prof. Dr. med. Dominik Denschlag             | Deutsche Gesellschaft für Gynäkologie und Geburtshilfe            |
| <b>weitere beteiligte Leitlinienautoren:</b> |                                                                   |
| Prof. Dr. med. Matthias W. Beckmann          | Deutsche Gesellschaft für Gynäkologie und Geburtshilfe            |
| PD Dr. med. Falk C. Thiel                    | Deutsche Gesellschaft für Gynäkologie und Geburtshilfe            |
| PD Dr. med. Sven Ackermann                   | Arbeitsgemeinschaft Gynäkologische Onkologie                      |
| PD Dr. med. Ingolf Juhasz-Boess              | Arbeitsgemeinschaft Gynäkologische Onkologie                      |
| PD Dr. med. Philipp Harter                   | Arbeitsgemeinschaft Gynäkologische Onkologie                      |
| Prof. Dr. med. Peter Mallmann                | Arbeitsgemeinschaft Gynäkologische Onkologie                      |
| Dr. med. Hans-Georg Strauß                   | Arbeitsgemeinschaft Gynäkologische Onkologie                      |
| Prof. Dr. med. Uwe Ulrich                    | Arbeitsgemeinschaft Gynäkologische Onkologie                      |
| Prof. Dr. med. Lars-Christian Horn           | Deutsche Gesellschaft für Pathologie                              |
| Prof. Dr. med. Dr. h. c. Dietmar Schmidt     | Deutsche Gesellschaft für Pathologie                              |
| PD Dr. med. Peter Reichardt                  | Deutsche Gesellschaft für Hämatologie und Medizinische Onkologie  |
| Prof. Dr. med. Thomas Vogel                  | Deutsche Röntgengesellschaft                                      |
| Prof. Dr. med. Dirk Vordermark               | Deutsche Gesellschaft für Radioonkologie                          |
| Dr. med. Wolfgang Cremer                     | Bundesverband der Frauenärzte e. V.                               |
| Marion Gebhardt                              | Bundesverband Selbsthilfegruppe Frauen nach Krebs e. V.           |

### Leitliniendokumente

Die vollständige Langfassung und eine DIA-Version dieser Leitlinien sowie eine Aufstellung der Interessenkonflikte aller Autoren befinden sich auf der Homepage der AWMF:

<http://www.awmf.org/leitlinien/detail/ll/015-074.html>

### Autoren

Siehe **Tab. 1**.

### Abkürzungen

|        |                                       |
|--------|---------------------------------------|
| LMS    | Leiomyosarkome                        |
| LG-ESS | Low-Grade endometriale Stromasarkome  |
| HG-ESS | High-Grade endometriale Stromasarkome |
| UUS    | undifferenzierte uterine Sarkome      |

## II Leitlinienverwendung

### Fragestellung und Ziele

Aufgrund der biologischen Heterogenität uteriner Sarkome (inklusive Karzinosarkome) und der damit einhergehenden verbreiteten Unsicherheit bzgl. eines individuellen optimalen Managements erscheint eine Leitlinie zur Verbesserung der Versorgungsqualität notwendig.

### Versorgungsbereich

Die Zielorientierung der Leitlinie beinhaltet die Information und Beratung von Frauen über die Diagnostik, die Therapie sowie die Nachsorge. Fokussiert wird hierbei auf das differenzierte Ma-

nagement der unterschiedlichen Subtypen (inklusive Karzinosarkome). Darüber hinaus sollen die Informationen Grundlage zur Therapie-Entscheidungsfindung der Interdisziplinären Tumorkonferenz in den im Aufbau befindlichen Gynäkologischen Krebszentren sein.

### Adressaten

Die Leitlinie richtet sich an folgende Personenkreise:

- Die Empfehlungen der Leitlinie richten sich an alle Ärzte (speziell Gynäkologen, Pathologen, Strahlentherapeuten und Medizinische Onkologen) und Angehörige von Berufsgruppen, die mit der Versorgung von Patientinnen mit uterinen Sarkomen (inklusive Karzinosarkome) befasst sind.
- Sowohl im ambulanten als auch im stationären Sektor.

### Gültigkeitsdauer

Die Gültigkeit dieser Leitlinie wurde durch die Vorstände/Verantwortlichen der beteiligten Fachgesellschaften/Arbeitsgemeinschaften/Organisationen/Vereine sowie durch den Vorstand der DGGG und der DGGG-Leitlinienkommission um Juli 2015 bestätigt und damit in seinem gesamten Inhalt genehmigt. Diese Leitlinie besitzt eine Gültigkeitsdauer von 01.08.2015 bis 31.07.2018. Diese Dauer ist aufgrund der inhaltlichen Zusammenhänge geschätzt. Bei dringendem Bedarf kann eine Leitlinie früher aktualisiert werden, bei weiterhin aktuellem Wissenstand kann ebenso die Dauer verlängert werden.

## III Leitlinie

### 1 Methodik

Die Methodik zur Erstellung dieser Leitlinie wird durch die Vergabe der Stufenklassifikation vorgegeben. Das AWMF-Regelwerk (Version 1.0) gibt entsprechende Regelungen vor. Es wird zwischen der niedrigsten Stufe (S1), der mittleren Stufe (S2) und der höchsten Stufe (S3) unterschieden. Die niedrigste Klasse definiert sich durch eine Zusammenstellung von Handlungsempfehlungen, erstellt durch eine nicht repräsentative Expertengruppe. Im Jahr 2004 wurde die Stufe S2 in die systematische Evidenzrecherche-basierte (S2e) oder strukturelle konsensbasierte Unterstufe (S2k) gegliedert. In der höchsten Stufe S3 vereinigen sich beide Verfahren.

#### Diese Leitlinie entspricht der Stufe S2k.

Grundlage des Leitlinientextes bildete eine systematische Literaturrecherche. Im Folgenden wurde die relevante Literatur den jeweiligen Kapiteln zugeordnet und die Kapitel inkl. Literatur den jeweilig verantwortlichen Autoren zur Verfügung gestellt. Anhand der einzelnen Kapitel wurde im Anschluss eine zusammenhängende Fassung erstellt, welche dann im gemeinsamen Vorab-Konsens bearbeitet und verabschiedet wurde. Aus diesem Text wurden Statements und Empfehlungen (im Sinne von eindeutigen Handlungsanweisungen) extrahiert. Anschließend wurde der so überarbeitete Text erneut zirkuliert und an Vertreter anderer Fachgruppen verschickt. Diese haben z.T. Änderungsvorschläge für den Text gemacht und abschließend dem finalen Manuskript zugestimmt. Die Statements und Empfehlungen wurden während einer Konsensuskonferenz, die am 20.05.2015 in Berlin stattfand, interdisziplinär abgestimmt. Leitlinienkommission und Vorstand der DGGG stimmten der Leitlinie im August 2015 zu.

**Tab. 2** FIGO- und TNM-Staging von Leiomyosarkomen und endometrialen Stromasarkomen\* des Uterus.

| FIGO-/TNM-Stadium | Definition                                                           |
|-------------------|----------------------------------------------------------------------|
| I/T1              | Tumor begrenzt auf den Uterus                                        |
| IA/T1a            | ≤ 5 cm in größter Ausdehnung                                         |
| IB/T1b            | > 5 cm in größter Ausdehnung                                         |
| II/T2             | Tumor breitet sich im Becken, jenseits des Uterus aus                |
| IIA/T2a           | Befall der Adnexe (einseitig oder beidseitig)                        |
| IIB/T2b           | Tumorausbreitung im extrauterinen pelvinen Gewebe, andere als Adnexe |
| III/T3            | Tumor infiltriert Strukturen des Abdomens                            |
| N1                | eine Lokalisation                                                    |
| IIIB/T3b          | mehr als eine Lokalisation                                           |
| IIIC              | Metastasen in pelvinen und/oder paraaortalen Lymphknoten             |
| IVT4              | Tumor infiltriert Blase und/oder Rektum                              |
| IVB               | Fernmetastasen                                                       |

\* Simultane Tumoren des Corpus uteri und von Ovar/Becken in Begleitung einer Endometriose von Ovar/Becken sollen als unabhängige Primärtumoren klassifiziert werden.

## 2 Einführung

### 2.1 Inzidenz, Tumortypisierung bzw. Klassifikation und Stadieneinteilung

Uterine Sarkome bezeichnen eine heterogene Gruppe insgesamt seltener Malignome der Uterusmuskulatur oder des uterinen Bindegewebes. Sie machen 3–9% aller Malignome des Uterus aus. Die Inzidenz liegt bei ca. 1,5 (Kaukasier) – 3 (Afroamerikaner)/100 000 Einwohner [1].

Die Tumortypisierung erfolgt nach der WHO-, die Stadieneinteilung nach der FIGO- bzw. TNM-Klassifikation [2, 3]. In der WHO-Klassifikation sind folgende Entitäten als maligne mesenchymale Tumoren bzw. maligne gemischte epithelial-mesenchymale Tumoren aufgeführt [3, 4]:

- ▶ Leiomyosarkome (LMS),
  - ▶ Low-Grade endometriale Stromasarkome (LG-ESS),
  - ▶ High-Grade endometriale Stromasarkome (HG-ESS),
  - ▶ undifferenzierte uterine Sarkome (UUS),
  - ▶ Adenosarkome,
  - ▶ Rhabdomyosarkome,
  - ▶ PECome (perivascular epitheloid cell tumor), maligne Variante.
- Die wesentlichen morphologischen Kriterien werden nachfolgend entitätsbezogen kurz dargestellt.

Die Diagnostik anderer, selten im Uterus vorkommender Sarkome soll unter Berücksichtigung der WHO-Klassifikation von Weichteilsarkomen erfolgen [5].

Neben den extrem seltenen Formen (Rhabdomyosarkom, Angiosarkom, neurogenes Sarkom, Osteosarkom, Chondrosarkom, Liposarkom, PNET, PECome, Myxofibrosarkom, alveoläres Weichteilsarkom und epitheloides Sarkom), bezieht sich diese Leitlinie auf die häufigeren Entitäten (LMS, LG-ESS, HG-ESS und UUS bzw. Adenosarkom).

Am häufigsten finden sich Leiomyosarkome mit 60–70% der uterinen Sarkome bzw. 1–2% aller uterinen Malignome, gefolgt von den Low-Grade ESS und den High-Grade ESS bzw. den undifferenzierten uterinen Sarkomen mit jeweils ca. 10% der uterinen

**Tab. 3** FIGO-/TNM-Staging von Adenosarkomen\* des Uterus.

| FIGO-/TNM-Stadium | Definition                                                             |
|-------------------|------------------------------------------------------------------------|
| I/T1              | Tumor begrenzt auf den Uterus                                          |
| IA/T1a            | Tumor begrenzt auf Endometrium/Endozervix ohne myometrane Infiltration |
| IB/T1b            | Infiltration weniger als die Hälfte des Myometriums                    |
| IC/T1c            | Infiltration ≥ 50% des Myometriums                                     |
| II/T2             | Tumorausbreitung im Becken                                             |
| IIA/T2a           | Befall der Adnexe (einseitig oder beidseitig)                          |
| IIB/T2b           | Tumorausbreitung im extrauterinen pelvinen Gewebe, andere als Adnexe   |
| III/T3            | Tumorausbreitung intraabdominal                                        |
| N1                | eine Lokalisation                                                      |
| IIIB/T3b          | mehr als eine Lokalisation                                             |
| IIIC              | Metastasen in pelvinen und/oder paraaortalen Lymphknoten               |
| IV/T4             | Tumor infiltriert Blasen- und/oder Rektumschleimhaut                   |
| IVB               | Fernmetastasen                                                         |

\* Simultane Tumoren des Corpus uteri und von Ovar/Becken in Begleitung einer Endometriose von Ovar/Becken sollen als unabhängige Primärtumoren klassifiziert werden.

Sarkome. Weiterhin finden sich Adenosarkome und andere heterologe Sarkome (Fibrosarkome, Liposarkome, Chondrosarkome, Osteosarkome, etc.) mit insgesamt unter 5% der uterinen Sarkome [6]. Das mittlere Erkrankungsalter der uterinen Sarkome liegt abhängig vom Tumortyp bei 50–70 Jahren. Als Risikofaktoren wurden eine vorausgegangene Strahlentherapie des Beckens und die Einnahme von Tamoxifen identifiziert. Darüber hinaus ist bei Frauen afrikanischer Abstammung die Inzidenz an uterinen Sarkomen um das 2–3-Fache höher als bei Asiatinnen oder Frauen europäischer Abstammung.

Die postoperative Stadieneinteilung erfolgt nach der pTNM-Klassifikation [2] und der FIGO-Klassifikation (● **Tab. 2** und **3**).

Die in früheren Klassifikationen gleichfalls als uterine Sarkome bezeichneten Karzinosarkome (auch als Maligne Müller-Mischtumoren bezeichnet) werden nicht mehr den Uterussarkomen, sondern den Karzinomen des Uterus zugerechnet [7, 8]. Da diese Tumorentität allerdings bisher in anderen Leitlinien nur unzureichend abgebildet ist, wird diese hier mit aufgeführt. Mittelfristig ist geplant, diese Entität im Rahmen der anstehenden S3-LL Endometriumkarzinom abzuhandeln.

Die Inzidenz liegt mit ca. 2–4/100 000 Einwohner etwas höher als bei den uterinen Sarkomen. Ebenso scheint das mediane Erkrankungsalter (ca. 65 Jahre) im Vergleich etwas höher zu liegen, wogegen die postulierten Risikofaktoren (Tamoxifen, Radiatio des Beckens, afroamerikanische Abstammung, s.o.) den klassischen Sarkomen zu entsprechen scheinen.

Ganz allgemein ist die Prognose beim Karzinosarkom ungünstig mit einem durchschnittlichen 5-Jahres-Gesamtüberleben von lediglich ca. 30%. Signifikante Prognosefaktoren beim Karzinosarkom sind neben dem Alter, ethnischer Herkunft und Tumorstadium [9–12].

### 2.2 Diagnostik

Es gibt keine spezifischen Symptome für uterine Sarkome. Als suspekt gilt ganz allgemein der „schnell wachsende Uterus“ bei niedrigen Östrogenspiegeln in der Postmenopause. Aufgrund der fehlenden spezifischen Symptomatik wird in der Mehrzahl

der Fälle die Diagnose entweder als Zufallsbefund am Hysterektomie-Präparat gestellt oder aber erst in fortgeschrittenen Stadien durch eine entsprechende sekundäre Begleitsymptomatik (z.B. Dyspnoe bei pulmonaler Metastasierung). Bezüglich des Risikos eines Sarkoms bei „schnell wachsendem Uterus“ (z.B. [13], Größenzunahme um 6 Schwangerschaftswochen innerhalb eines Jahres) ergab jedoch eine Analyse von Parker und Mitarbeitern an über 1300 Patientinnen (hiervon ca. 350 mit „schnellem Wachstum“) kein erhöhtes Sarkomrisiko gegenüber den entsprechenden Kontrollen (0,27 vs. 0,23%) [14]. In ca. zwei Drittel der Fälle findet sich hinweisend eine pathologische vaginale Blutung [15]. Im Gegensatz zu Karzinomen sind jedoch die Hysteroskopie und Abrasio nicht immer diagnostisch beweisend. So kann das Ergebnis bei mesenchymalen Tumoren des Uterus nicht selten falsch negativ sein, d.h., letztere bleiben häufig zunächst unentdeckt, wenn sich bei Blutungsstörungen oder Postmenopausenblutungen die Indikation zur histologischen Abklärung ergibt. Somit sind diese diagnostischen Methoden nicht in der Lage, ein uterines Sarkom auszuschließen [16, 17].

Bei klinischem Verdacht auf ein Malignom des Uterus sind morcellierende Verfahren kontraindiziert, da diese zu einer Prognoverschlechterung führen [18]. In jedem Falle sollen bei geplantem Morcellement auch bei klinisch nicht suspekt erscheinendem Tumor die Patientin über dieses Risiko aufgeklärt und alternative Verfahren angeboten werden.

### Bildgebung

Die bildgebende Diagnostik von uterinen Sarkomen umfasst zunächst die Evaluation der Topografie einer Raumforderung der Gebärmutter, insbesondere differenzialdiagnostisch gegenüber weiteren pelvinen Raumforderungen. Die Beurteilung der Invasionstiefe, der Infiltration benachbarter Organe und die Einschätzung der Lymphknoten sowie weiterer pelviner Tumorabsiedlungen gehört zu den weiteren Aufgaben der radiologischen Diagnostik.

Abgesehen von Ultraschallverfahren, die derzeit das diagnostische Verfahren der ersten Wahl bezüglich Bildgebung des Uterus darstellen, wird eine hohe diagnostische Sensitivität und Spezifität auch mittels MRT durch den Einsatz von speziellen Diffusions-Sequenzen (DWI-Sequenzen) sowie kontrastmittelverstärkter Sequenzen erreicht [19]. Wichtige bildgebende Kriterien bezüglich des Uterus sind dabei die Evaluation von Nekrosezonen, des Wachstums und jeweils der Wandbegrenzung. Die abdominelle Bildgebung kann weiterhin durch den Einsatz der Computertomografie erfolgen. Diese dient zur Erfassung von Raumforderungen, der Evaluation von Lymphknoteninvasionen und Organinfiltrationen, wie der Leber, Milz, Peritoneum und Pelottierung von Darmabschnitten.

Die aktuelle Rolle der Positronenemissionstomografie (FDG-PET) zur Darstellung von uterinen Sarkomen wird in der Arbeit von Sadeghi [20] hinreichend dargestellt. In diesem Review wurden 8 Studien analysiert. Davon lieferten nur 2 Studien genaue Daten zum primären Staging des Uterussarkoms mit einer geringen Sensitivität für die Detektion der Lymphknoten. Die Rolle der PET-CT in der Rezidivdiagnostik wurde auch von Sharma [21] innerhalb von 15 Untersuchungen evaluiert. Diese Arbeit fasst jedoch zusammen, dass die PET-CT derzeit keine Mehrinformation im Vergleich zu konventionellen CT- oder MRT-Untersuchungen liefert.

Es wird zusammengefasst, dass hier weitere Studien notwendig sind. Derzeit kann für die Primärdiagnostik des uterinen Sarkoms der primäre Einsatz der PET-CT nicht empfohlen werden.

Zusammenfassend stellt die Sonografie derzeit das primäre diagnostische Verfahren zur Beurteilung des Uterus dar. Weiterhin zu empfehlen ist der Einsatz der MRT zur lokalen Ausbreitung und zur Erfassung der lokalen Tumordinfiltration.

Im Bereich des Abdomens liegen derzeit keine wissenschaftlich fundierten Daten zur verbesserten Diagnostik und Ergebnissen der MRT im Vergleich zur CT vor.

Aufgrund des hohen Metastasierungspotenzials sollte darüber hinaus eine Computertomografie des Thorax erfolgen.

### Aufarbeitung des Gewebes

#### Abradate und diagnostische Biopsien

Die Diagnostik uteriner Sarkome setzt repräsentative Gewebeentnahmen voraus. Ergibt sich im Abradat der morphologische Verdacht auf ein Sarkom, und ist das übersandte Gewebe nicht bereits vollständig aufgearbeitet, erscheint es zweckmäßig, weiteres Material einzubetten. Zur histologischen Sicherung entnommenes Gewebe in Stanzbiopsien soll in Stufenschnitten aufgearbeitet werden. In der Regel sind 3 Stufenschnitte in einem Abstand von ca. 200 µm ausreichend.

Insbesondere bei regressiven Veränderungen oder ausgedehnten Nekrosearealen im Abradat bzw. Biopsien kann die endgültige histogenetische Einordnung uteriner Sarkome problematisch sein. Dennoch sollte das Gewebe auch unter Einsatz immunhistochemischer und ggf. molekularpathologischer Methoden adäquat aufgearbeitet werden, da insbesondere bei (lokal) fortgeschrittener Erkrankung bzw. anästhesiologischer/internistischer Risikokonstellation ein definitives operatives Vorgehen problematisch sein kann, und die Biopsie dann therapierelevant ist.

Beim Nachweis einer Lymph- bzw. Blutgefäßinvasion soll dazu im Befundbericht Stellung genommen werden [3, 22–24].

#### Präparate nach Hysterektomie bzw. operativer Therapie uteriner Sarkome

Der pathologische Befundbericht soll zur Größe und Beschaffenheit des Präparats (aufgerissenes Präparat, Morcellement) Stellung nehmen mit dezidierte Angabe der resezierten Strukturen [3, 23, 24]. Insbesondere bei morcellierten/in mehreren Teilstücken übersandten Uteri sollte besonders auf auffällige makroskopische Befunde (z.B. Diskolorationen, Hämorrhagien, Einblutungen, ggf. unscharfe Begrenzung von Herdbefunden) geachtet werden und eine adäquate Gewebeentnahme erfolgen [25].

Die morphologische Aufarbeitung soll so erfolgen, dass alle in der nachfolgenden Liste erforderlichen Angaben erhoben werden können [3, 22–24].

- histologischer Tumortyp nach WHO
- Grading bei ESS
- Nachweis/Fehlen von Lymph- oder Blutgefäßinbrüchen (L- und V-Status)
- Nachweis/Fehlen von Perineuralscheideninfiltraten (Pn-Status)
- Staging (pTNM)
- Invasionstiefe in das Myometrium bzw. (endo-)zervikale Stroma
- 3-dimensionale Tumorgröße in cm
- metrische Angabe des minimalen Abstands des Sarkoms zu den jeweils relevanten Resektionsrändern
- R-Klassifikation (UICC)

Die Messung des Abstands zu den jeweiligen Resektionsrändern erfolgt von der Stelle der tiefsten Tumordinfiltration bis zum chirurgischen Resektionsrand, entweder nach Markierung auf dem

Objektträger mittels eines Lineals oder bei geringen Abständen mittels Okularmikrometer.

Bei unklarem histologischen Befund soll eine ausgedehnte Gewebeentnahme erfolgen, die in der Regel einen Block pro Zentimeter größter Tumorausdehnung umfasst (sog. extensive sampling).

In jedem Fall sollte die Patientin mit der Diagnose eines uterinen Sarkoms in einer interdisziplinären Tumorkonferenz vorgestellt werden.

### 3 Uterine Karzinosarkome/ Maligne Müller-Mischtumoren

#### 3.1 Einführung

Die in früheren Klassifikationen gleichfalls als uterine Sarkome bezeichneten Karzinosarkome (auch als Maligne Müller-Mischtumoren bezeichnet) werden – wie bereits erwähnt – nicht mehr den Uterussarkomen, sondern den Karzinomen des Uterus zugeordnet. Hierbei handelt es sich nach aktueller Auffassung um metaplastische, dedifferenzierte Endometriumkarzinome. Daraus resultierend erfolgt die Stadieneinteilung in Analogie zum Endometriumkarzinom [2,26].

Das mediane Erkrankungsalter liegt im 7. Lebensjahrzehnt (Spannweite 30–90 Jahre) [27]. Diese – vermutlich dedifferenzierten Endometriumkarzinome – fallen häufiger als Sarkome durch pathologische Blutungen auf, evtl. einhergehend mit einer vergrößerten Gebärmutter mit ggf. entsprechenden Beschwerden. Spezifische diagnostische Zeichen für das Vorliegen eines Karzinosarkoms/Malignen Müller-Mischtumors fehlen in den bildgebenden Verfahren (Ultraschografie, CT, MRT). Bei etwa 25% der Patientinnen liegen zum Zeitpunkt der primären Diagnose bereits Fernmetastasen vor, bzw. in bis zu 30% sind die Lymphknoten (pelvin und/oder paraaortal) befallen [28]. Aufgrund dieser gehäuft auftretenden fortgeschrittenen Stadien scheint auch der Tumormarker CA-125 zum Zeitpunkt der Diagnose überdurchschnittlich häufig erhöht. Die Beurteilung des Abradats ist oft schwierig, und es gelingt oft nur eine maligne Komponente nachzuweisen [16]. Somit gelingt die definitive Diagnose häufig erst am Hysterektomiepräparat.

Die 5-Jahres-Überlebensrate ist hauptsächlich vom initialen Stadium abhängig und beträgt im Stadium I/II ca. 50–60%; sie fällt in fortgeschrittenen Stadien signifikant ab (Stadium III/IV – ca. 10–20%).

#### 3.2 Histopathologische Diagnose und Stadieneinteilung

Karzinosarkome sind Tumoren, die histologisch sowohl aus einer malignen epithelialen (Karzinom-)Komponente als auch einem malignen mesenchymalen (Sarkom-)Anteil bestehen [29]. Gebräuchliche Synonyma sind die Begriffe Maligner Müller-Mischtumor (MMMT), maligner mesodermaler Mischtumor bzw. metaplastisches Karzinom [30].

Der homologe MMMT enthält dabei mesenchymale Elemente ausgehend von Zellen, die normalerweise im Uterus selbst vorkommen (sog. intrinsische Differenzierung). So werden als homologe mesenchymale Anteile ein endometriales Stromasarkom, ein undifferenziertes Sarkom, ein Fibro- oder Leiomyosarkom bzw. nicht selten eine Mischung aus diesen gesehen. Beim heterologen Typ werden Sarkomkomponenten beobachtet, deren benigne Ausführung normalerweise nicht im Uterus vorkommt (sog. extrinsische Differenzierung [30]). In absteigender Häufig-

keit handelt es sich dabei um Rhabdomyo- und Chondrosarkome, seltener um Osteo- und Liposarkome. Extrem seltene Anteile sind eine neuroektodermale, melanozytäre, neuroendokrine, rhabdoide oder Dottersack-Differenzierung [31–35].

Der maligne epitheliale (Karzinom-)Anteil ist in der Regel glandulär [29]. Auch nichtglanduläre Anteile, wie Plattenepithel- oder undifferenzierte Karzinome, kommen vor. Der glanduläre Anteil entspricht meist dem endometrioiden Endometriumkarzinom, seltener einem sog. Typ-2-Karzinom mit seröser oder klarzelliger Morphologie.

MMMT, die einen sehr ausgeprägten mesenchymalen Anteil aufweisen (sarcomatous overgrowth), können in ihrer Differenzialdiagnose zum Sarkom des Uterus problematisch sein, sodass eine ausreichende Einbettung notwendig ist [30].

#### 3.3 Operative Therapie

Im Frühstadium ist die Entfernung des Uterus und beider Adnexe in toto der Goldstandard des operativen Managements. In Analogie zum Hoch-Risiko-Endometriumkarzinom gibt es retrospektive Datenanalysen, die einen positiven Einfluss einer systematischen Lymphadenektomie auf das Gesamtüberleben der Patientinnen beschreiben, wobei ein positiver Lymphknotenstatus bei makroskopisch auf den Uterus begrenzter Erkrankung in bis zu 30% auftreten kann [11,12,36,37]. Ob darüber hinaus eine Omentektomie, wie von anderen Expertengruppen zumindest bei seröser epithelialer Komponente propagiert (www.nccn.org) sinnvoll ist, lässt sich durch die aktuelle Literatur nicht belegen. Im fortgeschrittenen Stadium kann eine zytoreduktive Operation durchgeführt werden, wenn eine Komplettresektion erreichbar scheint, wobei die Datenlage diesbezüglich allerdings limitiert ist [38].

#### 3.4 Adjuvante Systemtherapie und Radiatio

In einer randomisierten Phase-III-Studie an insgesamt 232 Patientinnen mit Karzinosarkomen konnte durch eine adjuvante Kombinations-Chemotherapie mit Cisplatin/Ifosfamid im Vergleich zu einer Ganz-Abdomenbestrahlung bei FIGO-Stadium I–IV und einem postoperativen Tumorrest von < 1 cm das Risiko, im Nachbeobachtungszeitraum von 5 Jahren zu versterben, um 29% – jedoch nicht signifikant – reduziert werden [39]. Darüber hinaus existieren Daten aus retrospektiven Analysen, die einen positiven Effekt einer solchen Therapie auch in frühen Stadien (I und II) vermuten lassen [40].

Die Entscheidung zur adjuvanten Chemotherapie muss daher mit der Patientin individuell unter Berücksichtigung des Befunds und nach ausführlicher Aufklärung über die Nebenwirkungen besprochen werden. Aufgrund des Toxizitätsprofils wird teilweise auch auf Carboplatin/Paclitaxel ausgewichen, wobei es hier nur Daten zur Aktivität in der metastasierten Situation gibt [41]. Für eine adjuvante endokrine Therapie liegen keine validen Daten vor.

Die adjuvante Beckenbestrahlung per externer Teletherapie mit 50,4 Gy im Stadium I oder II zeigte in einer randomisierten Studie [42] speziell für die Subgruppe der Patientinnen mit Karzinosarkom (n = 92) eine verbesserte lokale Kontrolle mit einer Reduktion der Lokalrezidivrate von 47 auf 24% im Beobachtungszeitraum (mediane Nachbeobachtung 6,8 Jahre) einhergehend mit einer tendenziellen, jedoch nicht signifikanten Verbesserung des Gesamtüberlebens.

Aufgrund der Verbesserung der lokalen Kontrolle sollte beim Karzinosarkom die Indikation zu einer postoperativen Radiotherapie bei Stadium FIGO I/II gestellt werden.

### 3.5 Therapie bei Metastasen und Rezidiv

Bei Wiederauftreten der Erkrankung sollte die Möglichkeit einer Komplettresektion bei isolierten Rezidiven bzw. Metastasen überprüft werden [43].

Mono-Chemotherapie-Schemata sind beim Karzinosarkom aufgrund unzureichender Therapieeffekte weder in der adjuvanten noch in der metastasierten Situation in größeren Phase-II- oder Phase-III-Studien untersucht worden. Akzeptable Ansprechraten bis 36% liegen nur zur Ifosfamid-Monotherapie vor [44]. Bezüglich Kombinationstherapien ergab die jüngste Cochrane-Analyse ein signifikant reduziertes Risiko zu versterben bei Gabe einer Ifosfamid-Kombination im Vergleich zu einer Ifosfamid-Monotherapie (HR Tod 0,75, 95%-KI 0,6–0,94) [45]. Aus dieser Analyse konnte im Rahmen einer Phase-III-Studie [46] ein signifikanter Vorteil der Kombination von Ifosfamid und Paclitaxel im Vergleich zu Ifosfamid allein sowohl für das progressionsfreie als auch das Gesamtüberleben demonstriert werden, sodass dieses Schema als mögliche Kombination empfohlen werden kann. Eine weitere Phase-III-Studie [44] zeigt einen Vorteil der Kombination von Ifosfamid und Cisplatin im Vergleich zu Ifosfamid nur für das progressionsfreie, jedoch nicht für das Gesamtüberleben, sodass diese relativ toxische Kombination zurückhaltender gesehen werden sollte. Weitere wirksame Kombinationen sind Carboplatin und Paclitaxel sowie Carboplatin und pegyliertes liposomales Doxorubicin [41,47,48].

Eine perkutane Strahlentherapie kann bei Lokal- bzw. lokoregionären Rezidiven gezielt zur Palliation eingesetzt werden [49]. Des Weiteren kann diese auch bei R1/R2-Resektionen bei lokalisierter Erkrankung sowohl im Rahmen der Primär- als auch Rezidivsituation in Erwägung gezogen werden.

## 4 Uterine Leiomyosarkome

### 4.1 Einführung

Das mediane Erkrankungsalter liegt bei 50 Jahren [17]. Klinisch können Blutungsstörungen und je nach Größe des Befunds Druckerscheinungen in der Scheide und im Abdomen angegeben werden. Oft aber sind die Patientinnen asymptomatisch. Somit sind LMS in der Regel Zufallsbefunde, die sich nach Hysterektomie oder „Myom“-Enukleation ergeben. Eine Abrasio bei Blutung ist oft nicht beweisend bzw. gestattet nicht den sicheren Abschluss.

Bedauerlicherweise gibt es auch bei Verdacht keine spezifischen Zeichen in den bildgebenden Verfahren (Sonografie, CT, MRT) [50].

Leiomyosarkome sind sehr aggressive Tumoren und mit einer ungünstigen Prognose assoziiert, selbst dann, wenn der Tumor noch auf den Uterus begrenzt ist. Nach den Regeln von WHO bzw. GOG werden daher Leiomyosarkome des Uterus nicht graduiert. Die Rezidivraten schwanken zwischen 53 und 71%. In einer Untersuchung aus Norwegen betrug die 5-Jahres-Überlebensrate auch im Stadium I nur 51% und im Stadium II 25% [51]. Immerhin zeigte diese Untersuchung eine signifikante prognostische Abhängigkeit im Stadium I für die Tumorgöße und den Mitoseindex, sodass insgesamt 3 prognostische Gruppen abgrenzbar waren. Ganz allgemein ist die Prognose beim LMS – wie bereits erwähnt – tendenziell eher ungünstig mit einem durchschnittlichen 5-Jahres-Gesamtüberleben 40–50% [52,53].

Lediglich im Frühstadium scheint sich dies günstiger darzustellen. So beträgt das 5-Jahres-Gesamtüberleben gemäß der größ-

ten Studie von Garg et al. (n = 819 Patientinnen) im Stadium IA 76,6% und bereits im Stadium IB lediglich 48,4% [11].

Signifikante Prognosefaktoren beim LMS sind das Alter und das Tumorstadium (Tumorgöße) [11,52].

Weitere Prognosefaktoren, die diskutiert werden, sind der tumorfreie Absetzungsrand, der Mitosescore sowie die Gefäßinvasion [52]. Darüber hinaus ist einer der wichtigsten negativen Prognosefaktoren das Morcellement [18].

### 4.2 Histopathologische Diagnose

Leiomyosarkome (LMS) treten entweder solitär im Uterus oder in Kombination mit Leiomyomata auf, sind dann in der Regel jedoch die größte Läsion innerhalb des Uterus. Nur ~25% der LMS sind <5 cm; zwei Drittel sind intramural, 20% submukös und 10% subserös lokalisiert; ~5% finden sich in der Cervix uteri.

Die Schnittfläche ist typischerweise grau-weiß, weich, fischfleischartig und zumeist mit Nekrosen, Einblutungen (sog. bunte Schnittfläche) und z.T. mit unscharfer Randbegrenzung assoziiert. Myxoide LMS weisen typischerweise eine myxoid-zystische Schnittfläche auf [54].

Histologisch werden in der WHO-Klassifikation das (klassische) Leiomyosarkom, sowie eine epitheloide und myxoide Variante aufgeführt [3].

In einem Teil der Fälle lässt sich ein infiltratives Wachstum in das umgebende Myometrium nachweisen. Die WHO-Klassifikation fordert für die Diagnose eines LMS den Nachweis von Mitosen und atypischen Tumorzellen [3]. Aufgrund der z.T. schwierigen Unterscheidung von infarktoiden Nekrosen und Tumorzellnekrosen wird dieser Parameter für die Diagnose nicht zwingend gefordert.

Für das Grading von LMS und anderen seltenen Sarkomen wird in der WHO-Klassifikation kein System angegeben [3]; Für das Grading endometrialer Stromasarkome (ESS) erfolgt in der WHO-Klassifikation eine Unterteilung in Low- und High-Grade-Tumoren [3]. Undifferenzierte uterine Sarkome (UUS) sind aufgrund der ungünstigen Prognose immer als High-Grade-Tumoren einzuschätzen. Bei extrauterinen Weichteilsarkomen favorisiert die WHO-Klassifikation zur Prognoseabschätzung und Festlegung des therapeutischen Vorgehens das Gradingssystem der Fédération Nationale des Centres de Lutte Contre le Cancer, das sog. FNCLCC-Gradingssystem [55–58], das auch von der European Organisation for Research and Treatment of Cancer (EORTC), empfohlen wird. Das FNCLCC-Gradingssystem lässt sich jedoch nicht ohne Weiteres auf das uterine LMS und andere seltene Sarkome des Uterus übertragen. Wird das FNCLCC-Gradingssystem von den jeweiligen Therapeuten gefordert, kann es im Befundbericht angegeben werden mit dem Hinweis, dass bisher keine prädiktive bzw. prognostische Beurteilung vorliegt.

### 4.3 Operative Therapie

Die Entfernung des Uterus in toto bildet den Goldstandard des operativen Managements. Die Indikation zur Adnexexstirpation ist fakultativ in Abhängigkeit vom Menopausenstatus zu stellen. Bei jungen Frauen mit auf den Uterus beschränkten Tumoren können die Ovarien erhalten werden [11,17,59]. Ein intraperitoneales Morcellement führt zu einer schlechteren Prognose; deshalb ist von zerstückelnden Maßnahmen wie z.B. laparoskopischer suprazervikaler Hysterektomie oder aber laparoskopischem uteruserhaltendem Vorgehen mit intraperitonealem Morcellement bei Sarkomverdacht abzuraten [18,60].

Die Inzidenz von primären pelvinen und paraaortalen Lymphknotenmetastasen ist beim LMS niedrig. Sind die Lymphknoten

– hierbei häufig bereits intraoperativ auffällig – befallen, liegt meist auch schon eine hämatogene Metastasierung vor. Insofern ist eine systematische pelvine und paraaortale Lymphadenektomie nicht mit einer verbesserten Prognose verbunden und wird im Allgemeinen nicht empfohlen [61]. Suspekte Lymphknoten sollten dennoch entfernt werden. Bezüglich eines fertilitätserhaltenden Vorgehens liegen nur sehr limitierte Daten vor, sodass dies nicht empfohlen werden kann.

Bei ausgedehnten, fortgeschrittenen Befunden und Symptomatik sollte der Versuch der operativen Tumorreduktion erfolgen [59].

#### 4.4 Adjuvante Systemtherapie und Radiatio

Eine adjuvante systemische Therapie ist nicht generell indiziert, da bislang in keiner randomisierten Studie ein Vorteil im Gesamtüberleben nachgewiesen werden konnte. Aus den bisher vorliegenden Ergebnissen von prospektiven Phase-II-Studien als auch einer Phase-III-Studie scheinen aber Patientinnen mit Leiomyosarkom, bei denen der Tumor auf den Uterus begrenzt ist (Stadium I–IIIA mit ausschließlicher Befall der Uterusserosa), evtl. von einer systemischen Therapie nach Operation ohne Resttumor zu profitieren.

Eine Kombination aus Doxorubicin/Ifosfamid/Cisplatin scheint in diesem Zusammenhang einen signifikanten positiven Effekt auf das progressionsfreie 3-Jahres-Überleben (55% mit folgender Radiotherapie vs. 41% in der Kontrollgruppe mit alleiniger Radiotherapie) zu haben, jedoch einhergehend mit einer deutlich höheren Toxizität [62].

Ähnlich gute Ergebnisse mit jedoch geringerer Toxizität ergibt sich für eine Kombinations-Chemotherapie mit Docetaxel und Gemcitabin gefolgt von Doxorubicin (3-Jahres-PFS 57%) [63, 64]. Eine vergleichende Phase-III-Studie (Nachbeobachtung vs. Gemcitabin in Kombination mit Docetaxel gefolgt von Doxorubicin) wird derzeit durchgeführt (GOG #277).

Es gibt keine Daten für eine adjuvante endokrine Therapie bei Leiomyosarkomen des Uterus.

Die adjuvante Beckenbestrahlung mit 50,4 Gy im Stadium I oder II zeigte in einer randomisierten Studie [42] zwar eine verbesserte lokale Kontrolle für das Gesamtkollektiv mit unterschiedlichen Sarkomentitäten, jedoch in der Subgruppe der Patientinnen mit Leiomyosarkomen (n = 99) keinen Effekt auf die Lokalrezidivrate (20% mit Strahlentherapie – 24% ohne Strahlentherapie) als auch keinen Vorteil bezüglich des Gesamtüberlebens. Somit erscheint eine Strahlentherapie bei Komplettresektion eines LMS im Stadium I/II im Allgemeinen nicht indiziert. Bei R1/2-Resektionen bei lokal fortgeschrittenem, auf das Becken begrenzten Tumor kann diese erwogen werden.

#### 4.5 Therapie bei Metastasen und Rezidiv

Bei Rezidiven bzw. Metastasen uteriner Leiomyosarkome scheint allein die operative Komplettresektion mit einer verbesserten Prognose assoziiert zu sein [65–68]. Es sollte deshalb bei jedem Rezidiv bzw. isolierten Metastasen geprüft werden, inwieweit eine Komplettresektion möglich und sinnvoll ist. Einzelne Studien zeigten bei einem selektierten Patientenkollektiv ein verbessertes Überleben (medianes Überleben 45 vs. 31 Monate bzw. 2,0 vs. 1,1 Jahre) nach kompletter Resektion von Metastasen bei Leiomyosarkomen [65, 69]. Bei ausgewählten Patientinnen könnte insbesondere die Resektion von einzelnen Lungen- und/oder Lebermetastasen das Überleben verlängern [70, 71]. Ein krankheitsfreies Intervall von mehr als 6 bis 12 Monaten bei Leiomyosarkomen zeigte hierbei in mehreren Studien ein verbessertes Überleben nach Metastasenresektion, wohingegen ein verkürz-

tes erkrankungsfreies Intervall als auch eine inkomplette Resektion mit einer schlechteren Prognose assoziiert war.

Die Überlegenheit einer Kombinations- über eine Mono-Chemotherapie in dieser Situation ist bisher nur durch eine prospektiv-randomisierte Phase-II-Studie für die Kombination Docetaxel/Gemcitabin gezeigt worden [72].

Einige Kombinationen zeigen höhere Ansprechraten als Mono-Chemotherapien in der Metastasierung, allerdings einhergehend mit einer höheren Toxizität [73–75].

Für die Mono-Chemotherapie gibt es nur wenige wirksame Substanzen – Ifosfamid, Gemcitabin oder Doxorubicin mit moderaten Ansprechraten zwischen 15 und 25% [76, 77]. Auch Paclitaxel, Cisplatin, Topotecan und Etoposid wurden untersucht, scheinen aber unzureichend wirksam (geringe Ansprechraten < 10%) [78–81].

Trabectedin ist als Second-Line-Chemotherapie in der Metastasierung in Phase-II-Studien untersucht worden und sollte in dieser Indikation bevorzugt bei symptomatischer Metastasierung eingesetzt werden. Zwar dürfen nur sehr geringe Remissionsraten erwartet werden, häufig wird aber eine Stabilisierung der Erkrankung in bis zu 50% der Fälle erreicht [82].

Mit dem Multi-Tyrosinkinaseinhibitor Pazopanib wurde eine weitere Second-Line-Therapieoption durch eine doppelblinde, placebokontrollierte Phase-III-Studie mit Einschluss allerdings unterschiedlicher histologischer Sarkomtypen in der Metastasierung untersucht. Hinsichtlich der Remissionsraten und der Häufigkeit einer Stabilisierung der Erkrankung gilt die gleiche Aussage wie zum Trabectedin. In dieser Studie wurde das progressionsfreie Erkrankungsintervall im Gesamtkollektiv als auch in der Subgruppe der Leiomyosarkome durch Pazopanib signifikant verlängert [83].

Es gibt keine validen Daten für den primären Einsatz einer endokrinen Therapie, wenngleich wenige Kasuistiken mit einem Ansprechen der Metastasen auf einen Aromatasehemmer bei Nachweis des Östrogenrezeptors im Tumorgewebe bekannt sind (Letrozol 2,5 mg/d, Anastrozol 1 mg/d).

Eine perkutane Strahlentherapie kann bei lokoregionären Rezidiven, die nicht resektabel sind, gezielt zur Palliation eingesetzt werden [49]. Bei isolierten Befunden kann zudem eine postoperative Strahlentherapie zur ggf. besseren lokalen Kontrolle ohne nachgewiesenen Nutzen auf das Gesamtüberleben erwogen werden.

## 5 Low-Grade endometriale Stromasarkome

### 5.1 Einführung

Hier liegt das mediane Erkrankungsalter in der 6. Lebensdekade [17].

In der Regel werden diese Tumoren auffällig durch pathologische Blutungen, evtl. einhergehend mit einer vergrößerten Gebärmutter mit ggf. entsprechenden Beschwerden. Spezifische diagnostische Zeichen für Low-Grade ESS fehlen auch hier in den bildgebenden Verfahren (Sonografie, CT, MRT) [50]. Gleiches gilt für eine Abrasio bei abnormaler Blutung, die oft nicht zur korrekten Diagnose führt (s.o., z.B. bei intramuralem Sitz) [17]. Beim Low-Grade ESS ist das Stadium der wichtigste prognostische Faktor [84]. Die Rate für das krankheitsspezifische 5-Jahres-Überleben bei Low-Grade ESS im Allgemeinen beträgt 80–90%, für das 10-Jahres-Überleben ca. 70% [85, 86]. Ist der Tumor zum Zeitpunkt der Diagnose auf den Uterus begrenzt (Stadium I) betragen

die Raten sogar 100 bzw. 90%. In höheren Stadien fällt die Rate auf bis zu 40%.

## 5.2 Histopathologische Diagnose

In der Vergangenheit erfolgte eine Unterscheidung zwischen niedrig malignen und hoch malignen Stromasarkomen, die zwischenzeitlich in der WHO-Klassifikation aus dem Jahre 2003 verlassen wurde, aber in der neuen WHO-Klassifikation (2014) wieder zur Geltung kommt.

Bedingt durch diese Veränderungen in der Nomenklatur ist die Literatur im Laufe der Zeit nicht eindeutig zu differenzieren. Insofern beziehen sich die Empfehlungen dieser Leitlinie in Kapitel 4 auf das typische Low-Grade ESS im Gegensatz zu Kapitel 5, in dem die Empfehlungen zum High-Grade ESS als auch zum undifferenzierten uterinen Sarkom (UUS), die eine vergleichbare Tumorbilologie aufzuweisen scheinen, subsumiert wurden.

**Low-Grade ESS (LG-ESS)** sind definiert als maligne Tumoren bestehend aus mesenchymalen Zellen, die dem endometrialen Stroma des Endometriums in der Proliferationsphase ähneln [3]. Der Nachweis intratumoraler Hämorrhagien und/oder Nekrosen ist variabel. LG-ESS zeigen eine myometrische Infiltration mit oder ohne Lymph-, häufiger jedoch eine Blutgefäßinfiltration; letztere kann sich gelegentlich in extrauterine Gefäße ausbreiten. Eine nukleäre bzw. zelluläre Polymorphie kann fehlen oder ist gering ausgeprägt, die mitotische Aktivität ebenso.

## 5.3 Operative Therapie

Die Therapie der Wahl ist die totale Hysterektomie (ohne Morcellation) mit Entfernung beider Adnexe [87].

Die endokrine Abhängigkeit des LG-ESS ist gut belegt. So zeigt eine retrospektive Analyse von 153 LG-ESS-Patientinnen eine signifikant erhöhte Rezidivrate bei Belassen der Ovarien bei prämenopausalen Patientinnen. Sowohl in dieser Analyse als auch in 2 weiteren Auswertungen der SEER-Datenbank ergab sich allerdings kein negativer Einfluss auf das Gesamtüberleben. Insofern sollten die Vorteile eines Ovarerhalts bei jungen Patientinnen gegenüber dem Risiko einer höheren Rezidivwahrscheinlichkeit sorgfältig abgewogen und mit den Patientinnen kritisch diskutiert werden [88, 112–115].

Es gibt keine Daten zur onkologischen Sicherheit des Einsatzes einer Östrogentherapie nach durchgeführter Primärbehandlung eines Low-Grade ESS mit Entfernung beider Adnexe bei prämenopausalen Frauen. Aufgrund der Tumorbilologie des Low-Grade ESS mit hoher Östrogenabhängigkeit sollte von einer solchen Behandlung abgeraten werden [116].

Ein Lymphknotenbefall scheint keinen Einfluss auf die Prognose zu haben. Insofern ist von einer systematischen Lymphadenektomie als auch von darauf aufbauenden adjuvanten Therapieoptionen kein verlängertes Überleben zu erwarten, sodass die Lymphadenektomie insgesamt nicht als Standard empfohlen werden kann [50, 86, 88].

Ob bei fortgeschrittenen Tumoren eine Zytoreduktion einen Einfluss auf das Überleben der Patientinnen hat, ist unklar [89]. Die Indikation hierzu ergibt sich – ggf. in palliativer Intention – aus dem klinischen Beschwerdebild der Patientin.

## 5.4 Adjuvante Systemtherapie und Radiatio

Eine postoperative adjuvante endokrine Therapie kann mit der Patientin ab Stadium FIGO III diskutiert werden, obwohl prospektive Studien dazu fehlen. Die Daten aus vergleichenden retrospektiven Analysen zur adjuvanten Therapie sprechen für den Einsatz von entweder Medroxyprogesteronacetat 200 mg/d (in Deutschland lediglich als 250-mg-Dosis erhältlich) bzw. Megestrolacetat 160 mg/d oder alternativ für einen Aromatasehemmer (Letrozol 2,5 mg/d, Anastrozol 1 mg/d oder Exemestan 25 mg/d). Die adjuvante Therapiedauer ist unzureichend untersucht. Es wird eine Zeitdauer von 5 Jahren diskutiert [37].

Für eine adjuvante Chemotherapie liegen keine validen Daten vor.

Eine große epidemiologische Studie aus den USA an 3650 Patientinnen mit Uterussarkomen ergab sowohl einen signifikant positiven Einfluss einer adjuvanten Beckenbestrahlung ( $\pm$  Brachytherapie) auf das lokoregionär-rezidivfreie Überleben im gesamten Kollektiv [90] als auch in der Subgruppe der Patientinnen mit ESS ( $n = 361$ : nach 5 Jahren 97 vs. 93% bzw. nach 8 Jahren 97 vs. 87%). Eine weitere große epidemiologische Studie aus den USA an insgesamt 1010 Patientinnen mit ESS konnte jedoch bezüglich des Gesamtüberlebens keinen signifikanten Benefit einer adjuvanten Strahlentherapie nachweisen [86]. In der einzigen relevanten randomisierten Studie zur Beckenbestrahlung bei uterinen Sarkomen [42], in der 30 Patientinnen mit endometrialem Stromasarkom inkludiert waren, wurde das Überleben nicht separat für diese Subgruppe analysiert. Somit scheint beim endometrialen Stromasarkom die postoperative Strahlentherapie lediglich eine mäßiggradige weitere Verbesserung der ohnehin guten lokoregionären Kontrolle zu ermöglichen, was deshalb gegen die mittel- und langfristigen Nebenwirkungen abzuwägen ist.

## 5.5 Therapie bei Metastasen und Rezidiv

Endometriale Stromasarkome haben im Vergleich zu Leiomyosarkomen in der Regel eine bessere Prognose. Teilweise treten jedoch Rezidive noch nach Jahrzehnten auf [91]. Bei jedem Rezidiv bzw. Metastasen sollte überprüft werden, ob eine Operation mit dem Ziel der makroskopischen Komplettresektion möglich ist [43]. Aufgrund ihres langsamen Wachstums können ggf. auch wiederholte Resektionen bei Low-Grade endometrialen Stromasarkomen einen Benefit mit sich bringen [50].

Zur Palliation bei Lokal- bzw. lokoregionären Rezidiven, die nicht komplett resektabel sind, kann eine perkutane Strahlentherapie gezielt eingesetzt werden [92, 93].

Bei postoperativem Residualtumor, inoperablen Rezidiven oder Fernmetastasen von Low-Grade endometrialen Stromasarkomen kann eine Systemtherapie zum Einsatz kommen. Aufgrund ihrer hohen Expression von Östrogen- und Progesteronrezeptoren kommen bei Low-Grade endometrialen Stromasarkomen Gestagene oder Aromatasehemmer zum Einsatz [94–97].

Retrospektive Analysen von kleinen Fallserien sprechen für eine gute Wirksamkeit von Medroxyprogesteronacetat 200 mg/d (in Deutschland als 250-mg-Dosis erhältlich) oder Megestrolacetat 160 mg/d. Es sind Ansprechraten bis 82% beschrieben [95]. Obwohl weniger Daten vorliegen, scheinen alternativ auch Aromatasehemmer (Letrozol 2,5 mg/d, Anastrozol 1 mg/d oder Exemestan 25 mg/d) einen positiven Effekt zu haben [96].

Eine Chemotherapie sollte nur eingesetzt werden, wenn andere Optionen erschöpft sind. Studien, die eine Überlegenheit einer Kombinations- über eine Monotherapie zeigen, existieren nicht. Die Datenlage stützt sich nur auf Kasuistiken und Phase-II-Stu-

dien, in denen auch andere Uterussarkome behandelt wurden [98,99].

## 6 High-Grade endometriale Stromasarkome und undifferenzierte uterine Sarkome

### 6.1 Einführung

Das mediane Erkrankungsalter beträgt ca. 60 Jahre. Die Diagnose wird öfter erst in fortgeschrittenen Stadien gestellt. In der Regel können diese Tumoren ebenso durch pathologische Blutungen auffällig werden, evtl. einhergehend mit einer vergrößerten Gebärmutter mit ggf. entsprechenden Beschwerden. Aufgrund der häufigen Detektion in fortgeschrittenen Stadien ist die Prognose mit einem medianen Gesamtüberleben von 1–2 Jahren ungünstig [100, 101]. Als weiterer Prognosefaktor bezüglich des Überlebens als auch der lokalen Kontrolle wird neben dem Tumorstadium auch das Alter ( $\leq 60$  vs.  $> 60$  Jahre) postuliert [102].

### 6.2 Histopathologische Diagnose

**High-Grade endometriale Stromasarkome (HG-ESS)** sind Tumoren ausgehend vom endometrialen Stroma der Proliferationsphase des Endometriums mit infiltrativem und destruierendem Wachstum zumeist bis in die äußere Hälfte des Myometriums und oft nachweisbarer extrauteriner Ausbreitung. Die Majorität der HG-ESS zeigt intratumorale Nekrosen (mikroskopisch oder makroskopisch).

**Undifferenzierte uterine Sarkome (UUS)** sind High-Grade maligne mesenchymale Tumoren des Endo- oder Myometriums, die keine Ähnlichkeit mit dem endometrialen Stroma aufweisen und sich morphologisch keinem histogenetischen Typ zuordnen lassen [103]. Morphologisch handelt es sich um sehr polymorphe, mitotisch hochaktive Tumoren mit zahlreichen atypischen Mitosen, einem infiltrativ-destruktivem Wachstum mit z.T. rhabdoider und myxoider Struktur und Gefäßinfiltration [103]. Wie bereits erwähnt, ist der Terminus „undifferenziertes endometriales Sarkom (UES)“, der noch in der WHO-Klassifikation von 2003 geführt wurde [104], in der aktuellen WHO-Klassifikation nicht mehr enthalten [3] und sollte somit nicht mehr verwendet werden.

### 6.3 Operative Therapie

Die Therapie der Wahl besteht auch hier in einer totalen Hysterektomie (ohne Morcellement) und einer Adnexextirpation bds. Ob die Adnexe in der Prämenopause belassen werden können, ist unklar. Zwar sind positive pelvine und/oder paraaortale Lymphknoten mit einer schlechteren Prognose assoziiert, allerdings gibt es keinen Hinweis darauf, dass durch die operative Entfernung und darauf aufbauende adjuvante Therapieoptionen diese eingeschränkte Prognose verbessert wird.

Ob bei fortgeschrittenen Tumoren eine Zytoreduktion einen Einfluss auf das Überleben der Patientinnen hat, ist unklar. Eine multizentrische retrospektive Analyse konnte jedoch diesbezüglich – im Gegensatz zu den Low-Grade ESS – einen positiven Effekt einer Zytoreduktion auf das Überleben nachweisen [89].

### 6.4 Adjuvante Systemtherapie und Radiatio

Eine postoperativ adjuvante endokrine Therapie kann in Analogie zum Low-Grade ESS mit der Patientin dann besprochen werden, wenn im Tumor Östrogen- und/oder Progesteronrezeptoren nachgewiesen sind, obwohl auch hier prospektive Studien fehlen.

Bei ungünstiger Prognose dieses histologischen Typs und fehlenden Alternativen in der adjuvanten Therapie kann die Nutzen-Risiko-Bewertung bei der Aufklärung der Patientin für den Einsatz von Medroxyprogesteronacetat 200 mg/d (in Deutschland lediglich als 250-mg-Dosis erhältlich) oder Megestrolacetat 160 mg/d sprechen. Alternativ ist ein Aromatasehemmer (Letrozol 2,5 mg/d, Anastrozol 1 mg/d oder Exemestan 25 mg/d) in Betracht zu ziehen. Die adjuvante Therapiedauer ist unzureichend untersucht. Für eine adjuvante Chemotherapie liegen keine validen Daten vor, sodass dies individuell besprochen werden sollte. In einer multizentrischen retrospektiven Analyse wurden 59 Patientinnen mit endometrialen Stromatumoren untersucht, davon  $n = 29$  mit undifferenziertem uterinen Sarkom (58% in den Stadien I und II [FIGO 1988] [102]). 86% der Patientinnen erhielten eine externe Teletherapie des Beckens (mediane Dosis im Gesamtkollektiv 48 Gy) bzw. 51% eine Brachytherapie. Für die Patientinnen mit undifferenziertem uterinen Sarkom betrug nach 5 Jahren das Gesamtüberleben 65%, die lokoregionäre Kontrolle 40%. Die Beckenbestrahlung war in der Gesamtgruppe (endometriales Stromasarkom und undifferenziertes uterines Sarkom) in multivariater Analyse mit einem signifikant verbesserten Gesamtüberleben assoziiert. Somit besteht beim undifferenzierten uterinen Sarkom eine limitierte Datenlage zur Radiotherapie.

### 6.5 Therapie bei Metastasen und Rezidiv

Obwohl nur wenige Daten vorliegen, kann in Analogie zum Low-Grade ESS eine endokrine Therapie auch hier mit der Patientin dann besprochen werden, wenn im Tumor Östrogen- oder Progesteronrezeptoren nachgewiesen werden.

Im Allgemeinen kann diese Tumorentität chemotherapeutisch in Analogie zu anderen Weichteilsarkomen (z.B. Leiomyosarkom) behandelt werden, wobei die Daten hierfür insgesamt limitiert sind.

## 7 Uterines Adenosarkom

### 7.1 Einführung

Diese seltene Entität kommt in allen Altersklassen vor [105], mit einem Gipfel im 6. und 7. Lebensjahrzehnt. Sie scheint etwas häufiger als andere Sarkome durch Regeltempo- und Regeltypusstörungen aufzufallen, evtl. ebenso einhergehend mit einer vergrößerten Gebärmutter mit ggf. entsprechenden Beschwerden. Die Rezidivrate beim Adenosarkom ohne sarkomatöse Überwucherung beträgt 15–25%, bei den Fällen mit sarkomatöser Überwucherung 45–70%. Eine erhöhte Rezidivrate wird auch bei tiefer myometraner Invasion, Lymphgefäßinvasion, hochmaligner heterologer Stromakomponente und/oder einer extrauterinen Ausbreitung beobachtet. Die Rezidive finden sich vornehmlich im Becken oder in der Vagina. Fernmetastasen (vor allem pulmonal) kommen in ca. 5% der Fälle vor [106]. Die Mortalität des typischen Adenosarkoms beträgt 10–25%, diejenige bei einer sarkomatösen Überwucherung bis zu 75%. Aus einem umfangreichen Vergleich von über 500 Patientinnen mit Adenosarkom mit fast 5000 Patientinnen mit einem Karzinosarkom geht hervor, dass Patientinnen mit Adenosarkom eine deutlich günstigere Prognose haben. So betrug das 5-Jahres-Gesamtüberleben im Frühstadium 79% und im Stadium III immerhin noch 48% im Gegensatz zum Karzinosarkom mit lediglich 51% im Frühstadium bzw. 24% im Stadium III [107].

## 7.2 Histopathologische Diagnose

Entsprechend der WHO-Klassifikation werden Adenosarkome (AS) definiert als gemischte epithelial-mesenchymale Tumoren des Uterus mit benigner epithelialer und maligner mesenchymaler Komponente [108, 109]. Dabei zeigt die mesenchymale Komponente in ~90% der Fälle eine Low-Grade-Histologie. Entspricht die mesenchymale Komponente einem High-Grade-Sarkom (hochgradige Polymorphie, höhere Mitoserate, ggf. myometrane bzw. zervikale Stromainvasion und Veneneinbrüche mit z.T. Nachweis heterologer Elemente) und ist diese in >25% des Tumors nachweisbar, ergibt sich die Diagnose eines AS mit sarkomatöser Überwucherung (sarcomatous overgrowth).

## 7.3 Operative Therapie

Wie bei den anderen Sarkomen steht die Hysterektomie ohne Morcellement im Vordergrund.

Ob die Adnexe mit entfernt werden sollen, ist unklar.

Der Stellenwert einer systematischen pelvinen und paraaortalen Lymphadenektomie ist ebenso unklar [37].

In Fällen von fortgeschrittenen Befunden ist auch hier die maximale operative Tumorreduktion anzustreben.

## 7.4 Adjuvante Systemtherapie und Radiatio

In die Studien zur adjuvanten Therapie bei Karzinosarkomen/Malignen Müller-Mischtumoren des Uterus sind sehr wenige Adenosarkome eingegangen. Aussagekräftige Daten, insbesondere zur Chemotherapie, liegen somit nur für das Karzinosarkom vor. Die Daten können vermutlich nur bedingt auf das Adenosarkom übertragen werden.

## 7.5 Therapie bei Metastasen und Rezidiv

Aufgrund fehlender Daten wird analog zu den anderen uterinen Sarkomen die Überprüfung eines operativen Ansatzes mit Komplettresektion empfohlen. Eine Strahlentherapie kann zur Palliation von Lokalrezidiven bei Inoperabilität eingesetzt werden bzw. postoperativ bei isolierten Befunden erwogen werden. Ein optimales Regime bezüglich einer Systemtherapie fehlt. Rezidive von Adenosarkomen mit und ohne Sarcomatous Overgrowth zeigen jedoch ein Ansprechen auf ifosamid- bzw. doxorubicinhaltige Chemotherapien [110].

## 8 Nachsorge

Die Nachsorge dient der Sicherung des Heilerfolgs und der Lebensqualität.

Die tumorspezifisch orientierte Nachsorge der Patientin mit SpekulumEinstellung, vaginaler und rektaler Untersuchung und ggf. Ultraschall sollte in regelmäßigen Abständen erfolgen.

Ob eine lokale Intervention bei frühzeitig detektiertem unilokulärem Rezidiv zu einer Verbesserung des Gesamtüberlebens führt, ist unklar (siehe auch spezielle Kapitel der einzelnen Entitäten).

Gleichwohl kann eine weiterführende bildgebende Diagnostik zur Früherkennung von Metastasen sinnvoll sein.

Die allgemeine Nachsorge der Patientin zielt auf die psychosozialen und sozialmedizinischen Aspekte.

Die Betreuung soll auch berücksichtigen, dass eventuelle Begleiterkrankungen den Schweregrad der kurz-, mittel- und langfristigen Therapie Nebenwirkungen nach einer OP und/oder perkutanen Radiatio sowie einer medikamentösen/zytostatischen Behandlung erhöhen können.

## 9 Management morcelliertes Sarkom

Bezüglich der Fragestellung, wie im Falle eines morcellierten Sarkoms vorgegangen werden soll, existieren in der Literatur keine prospektiven Studien, sondern nur retrospektive Fallsammlungen. Deshalb schließen sich die Autoren dieser Leitlinie dem im August 2014 veröffentlichten Positionspapier der Deutschen Gesellschaft für Gynäkologie und Geburtshilfe bezüglich der Problematik des Uterussarkomrisiko bei Morcellation an [111]. In diesem werden Statements und Handlungsempfehlungen ausführlich dargestellt.

## 10 Patientinnenaufklärung

Die Aufklärung der Patientin über Diagnose, Prognose und Behandlungsmaßnahmen bei uterinen Sarkomen ist eine der zentralen Aufgaben des Arztes und ein entscheidender Bestandteil der Arzt-Patient-Kommunikation. Sie dient dem Aufbau eines Vertrauensverhältnisses und der aktiven Zusammenarbeit zwischen Arzt und Patientin. Der Wunsch nach Aufklärung ist bei Patientinnen erfahrungsgemäß groß. In der Regel erfolgt die Aufklärung nicht nur in einem einzigen Gespräch, sondern ist ein behandlungsbegleitender Prozess. Idealerweise mündet sie in einen gemeinsamen Entscheidungsprozess (shared decision making).

Eine gelungene Aufklärung wirkt sich positiv z.B. auf die Compliance, die Toleranz von Nebenwirkungen und die Behandlungszufriedenheit aus.

Die Informations- und Aufklärungspflichten gegenüber den PatientInnen sind seit 2013 im neuen „Gesetz zur Verbesserung der Rechte von Patientinnen und Patienten“ (PatRechteG, in Kraft getreten am 26.02.2013) geregelt. Der Deutsche Bundestag hat am 29. November 2012 die Gesetzesvorlage angenommen. Folgende Aspekte sind Gegenstand des Gesetzes: Die Informationspflichten zwischen Behandler und Patient, die Einwilligung, die Aufklärungspflichten, die Dokumentation der Behandlung, die Einsichtnahme in die Patientinnenakte und die Beweislast der Haftung bei Behandlungs- und Aufklärungsfehlern. Mit dieser gesetzlichen Regelung verbunden sind Verpflichtungen mit Gesetzescharakter, die über den Rahmen von Empfehlungen einer Leitlinie hinausgehen.

Folgende Aspekte gilt es im Rahmen der Aufklärung zu beachten: Ein angemessener Rahmen (störungsfreie und angenehme Umgebung, ausreichend Zeit) sollte gewährleistet sein. Es liegt im Ermessen der Patientin, ob der Partner, Angehörige oder Dritte einbezogen werden sollen. Förderlich für die Gesprächsführung sind aktives Zuhören und das Ausdrücken von Empathie sowie die Ermutigung der Patientin, Gefühle auszudrücken und Fragen zu stellen. Es wurden eine Reihe von Trainingsprogrammen entwickelt, um Ärzten die Möglichkeit zu geben, patientenzentrierte Gesprächsführung und den Umgang mit schwierigen Kommunikationssituationen einzuüben. Die Aufklärung sollte umfassend, verständlich (möglichst unter Verzicht auf medizinische Fachbegriffe) und wahrheitsgemäß sein. Hierbei ist insbesondere auf das Informationsbedürfnis und die Belastbarkeit der Patientin Rücksicht zu nehmen. Die Aufklärung ist in der Krankenakte zu dokumentieren.

Die alleinige Aufklärung von Angehörigen einer einsichtsfähigen Patientin ist in der Regel unzulässig, es sei denn, die Patientin hat dem ausdrücklich zugestimmt.

In Bezug auf die Diagnose soll der Arzt die Patientin wahrheitsgemäß informieren, ohne Inhalte zu verharmlosen; trotzdem soll je nach individueller Ausgangssituation der Erkrankung der Hoffnung auf Heilung oder Linderung genug Raum gegeben werden. In jedem Fall sollte der Arzt klären, ob die Informationen bei der Patientin wie intendiert angekommen sind. Im Rahmen der Aufklärung sollte auch auf weiterführende Hilfen hingewiesen werden, vor allem auf Unterstützung durch Psychoonkologen, Seelsorge oder Selbsthilfegruppen. Im Falle des Fortschreitens der Erkrankung ist es wichtig, dass die notwendige wahrheitsgemäße Aufklärung im Einklang mit der Vermittlung von Hoffnung stehen soll. Wenn keine Heilung mehr möglich ist, kann das Aufzeigen einer bestmöglichen Linderung von Beschwerden hilfreich sein.

Hinsichtlich der Behandlung sollten die Grundsätze der Behandlung in Bezug auf Zweck, Art, Umfang und Durchführung sowie den Nutzen wie auch das mit den Behandlungsmaßnahmen verbundene Risiko dargestellt werden. Alternativen in der Behandlung, z. B. im Rahmen einer Teilnahme an klinischen Studien, sind zu erklären. Auch die Nebenwirkungen oder mögliche Spätfolgen einer Behandlung mit ihren Auswirkungen auf die Lebensführung und Lebensqualität der Patientin sind zu erörtern. Auf das Recht, eine zweite Meinung einzuholen, soll hingewiesen werden. Die Notwendigkeit einer onkologischen Nachsorge und die Möglichkeiten der Rehabilitation nach abgeschlossener Behandlung sollen ebenfalls angesprochen werden, wie auch vorhandene Angebote psychoonkologischer und sozialrechtlicher Unterstützung sowie Leistungen durch Selbsthilfegruppen.

## Institute

- <sup>1</sup> Frauenklinik, Hochtaunuskliniken Bad Homburg, Bad Homburg
- <sup>2</sup> Frauenklinik, Alb Fils Kliniken, Göppingen
- <sup>3</sup> Frauenklinik, Klinikum Darmstadt, Darmstadt
- <sup>4</sup> Klinik für Gynäkologie und Gynäkologische Onkologie, Klinikum Essen Mitte, Essen
- <sup>5</sup> Klinik für Gynäkologie, Geburtshilfe und Reproduktionsmedizin, Universitätsklinikum des Saarlandes, Homburg/Saar
- <sup>6</sup> Klinik und Poliklinik für Frauenheilkunde und Geburtshilfe, Universitätsklinikum Köln, Köln
- <sup>7</sup> Klinik und Poliklinik für Gynäkologie, Universitätsklinikum Halle, Halle/Saale
- <sup>8</sup> Klinik für Gynäkologie und Geburtshilfe, Martin-Luther-Krankenhaus Berlin, Paul Gerhardt Diakonie, Berlin
- <sup>9</sup> Abteilung für Mamma-, Urogenital, und Perinatalpathologie, Institut für Pathologie, Universitätsklinikum Leipzig, Leipzig
- <sup>10</sup> Institut für Pathologie Mannheim, Mannheim
- <sup>11</sup> Universitätsklinik und Poliklinik für Strahlentherapie, Universitätsklinikum Halle, Halle/Saale
- <sup>12</sup> Institut für diagnostische und interventionelle Radiologie, Universitätsklinikum Frankfurt, Frankfurt/Main
- <sup>13</sup> Klinik für interdisziplinäre Onkologie, Helios Kliniken Berlin-Buch, Berlin
- <sup>14</sup> Frauenklinik, Universitätsklinikum Erlangen, Erlangen
- <sup>15</sup> Frauenselbsthilfe nach Krebs e. V., Erlangen

## Literatur

- 1 Brooks SE, Zhan M, Cote T et al. Surveillance, epidemiology, and end results analysis of 2677 cases of uterine sarcoma 1989–1999. *Gynecol Oncol* 2004; 93: 204–208
- 2 Wittekind C, Meyer HJ. TNM-Klassifikation maligner Tumoren. Weinheim: Wiley-VHC Verlag; 2010: 184–187
- 3 Oliva E, Carcangiu ML, Carinelli SG, Ip P, Loening T, Longacre TA, Nucci MR, Prat J, Zaloudek CJ. Mesenchymal Tumors of the Uterus. In: Kurman RJ, Carcangiu ML, Herrington CS, Young RH, eds. WHO Classification of Tumours of female reproductive Tract. Lyon: IARC Press; 2014: 135–147
- 4 Conklin CM, Longacre TA. Endometrial stromal tumors: the new WHO classification. *Adv Anat Pathol* 2014; 21: 383–393
- 5 Fletcher CDM, Bridge JA, Hogendoorn PCW, Mertens F. WHO Classification of soft Tissue and Bone. Lyon: IARC Press; 2013
- 6 D'Angelo E, Prat J. Uterine sarcomas: a review. *Gynecol Oncol* 2010; 116: 131–139

- 7 McCluggage WG. Malignant biphasic uterine tumours: carcinosarcomas or metaplastic carcinomas? *J Clin Pathol* 2002; 55: 321–325
- 8 Lopez-Garcia MA, Palacios J. Pathologic and molecular features of uterine carcinosarcomas. *Semin Diagn Pathol* 2010; 27: 274–286
- 9 Bansal N, Herzog TJ, Seshan VE et al. Uterine carcinosarcomas and grade 3 endometrioid cancers: evidence for distinct tumor behavior. *Obstet Gynecol* 2008; 112: 64–70
- 10 Callister M, Ramondetta LM, Jhingran A et al. Malignant mixed Müllerian tumors of the uterus: analysis of patterns of failure, prognostic factors, and treatment outcome. *Int J Radiat Oncol Biol Phys* 2004; 58: 786–796
- 11 Garg G, Shah JP, Kumar S, et al. Ovarian and uterine carcinosarcomas: a comparative analysis of prognostic variables and survival outcomes. *Int J Gynecol Cancer* 2010; 20: 888–894
- 12 Nemani D, Mitra N, Guo M et al. Assessing the effects of lymphadenectomy and radiation therapy in patients with uterine carcinosarcoma: a SEER analysis. *Gynecol Oncol* 2008; 111: 82–88
- 13 Buttram VC Jr., Reiter RC. Uterine leiomyomata: etiology, symptomatology, and management. *Fertil Steril* 1981; 36: 433–445
- 14 Parker WH, Fu YS, Berek JS. Uterine sarcoma in patients operated on for presumed leiomyoma and rapidly growing leiomyoma. *Obstet Gynecol* 1994; 83: 414–418
- 15 Liao Q, Wang J, Han J. [Clinical and pathological analysis on 106 cases with uterine sarcoma]. *Zhonghua Fu Chan Ke Za Zhi* 2001; 36: 104–107
- 16 Sreenan JJ, Hart WR. Carcinosarcomas of the female genital tract. A pathologic study of 29 metastatic tumors: further evidence for the dominant role of the epithelial component and the conversion theory of histogenesis. *Am J Surg Pathol* 1995; 19: 666–674
- 17 Zaloudek CJ, Hendrickson MR, Soslow RA. Mesenchymal Tumors of the Uterus. In: Kurman RJ, Hedrick Ellenson L, Ronnett BM, eds. Blaustein's Pathology of the female genital Tract. New York, Dodrecht, Heidelberg, London: Springer; 2011
- 18 Park JY, Park SK, Kim DY et al. The impact of tumor morcellation during surgery on the prognosis of patients with apparently early uterine leiomyosarcoma. *Gynecol Oncol* 2011; 122: 255–259
- 19 Santos P, Cunha TM. Uterine sarcomas: clinical presentation and MRI features. *Diagn Interv Radiol* 2015; 21: 4–9
- 20 Sadeghi R, Zakavi SR, Hasanzadeh M et al. Diagnostic performance of fluorine-18-fluorodeoxyglucose positron emission tomography imaging in uterine sarcomas: systematic review and meta-analysis of the literature. *Int J Gynecol Cancer* 2013; 23: 1349–1356
- 21 Sharma P, Kumar R, Singh H et al. Role of FDG PET-CT in detecting recurrence in patients with uterine sarcoma: comparison with conventional imaging. *Nucl Med Commun* 2012; 33: 185–190
- 22 Coffey D, Kaplan AL, Ramzy I. Intraoperative consultation in gynecologic pathology. *Arch Pathol Lab Med* 2005; 129: 1544–1557
- 23 Otis CN et al. Protocol for the examination of specimens from patients with sarcoma. 2013. Online: [http://www.cap.org/apps/docs/committees/cancer/cancer\\_protocols/2013/UterineSarcomaProtocol\\_3000.pdf](http://www.cap.org/apps/docs/committees/cancer/cancer_protocols/2013/UterineSarcomaProtocol_3000.pdf); Stand: 19.06.2015
- 24 McCluggage WG, Fisher C, Hirschowitz L. Dataset for histological reporting of uterine sarcomas. 2014. Online: [https://www.rcpath.org/Resources/RCPATH/Migrated%20Resources/Documents/G/G106\\_UterineSarcomaDataset\\_Dec14.pdf](https://www.rcpath.org/Resources/RCPATH/Migrated%20Resources/Documents/G/G106_UterineSarcomaDataset_Dec14.pdf); Stand: 19.06.2015
- 25 Ehdavand S, Simon RA, Sung CJ et al. Incidental gynecologic neoplasms in morcellated uterine specimens: a case series with follow-up. *Hum Pathol* 2014; 45: 2311–2317
- 26 Horn LC, Schierle K, Schmidt D et al. [Current TNM/FIGO classification for cervical and endometrial cancer as well as malignant mixed müllerian tumors. Facts and background]. *Pathologe* 2011; 32: 239–243
- 27 Hedrick Ellenson L, Ronnett BM, Soslow RA, Zaino RJ. Endometrial Carcinoma. In: Kurman RJ, Hedrick Ellenson L, Ronnett BM, eds. Blaustein's Pathology of the female genital Tract. New York, Dodrecht, Heidelberg, London: Springer; 2011
- 28 Amant F, de la Rey M, Dorfling CM et al. PTEN mutations in uterine sarcomas. *Gynecol Oncol* 2002; 85: 165–169
- 29 McCluggage WG, Haller U, Kurman RJ, Kubik-Huch RA. Mixed epithelial and mesenchymal Tumours. In: Tavassoli FA, Devilee P, eds. Pathology and Genetics of Tumours of the Breast and female genital Organs. World Health Organization Classification of Tumours. Lyon: IARC Press; 2003: 245–249
- 30 Horn LC, Dallacker M, Bilek K. [Carcinosarcomas (malignant mixed Müllerian tumors) of the uterus. Morphology, pathogenetic aspects and prognostic factors]. *Pathologe* 2009; 30: 292–301

- 31 Amant F, Moerman P, Davel GH et al. Uterine carcinosarcoma with melanocytic differentiation. *Int J Gynecol Pathol* 2001; 20: 186–190
- 32 Baschinsky DY, Niemann TH, Eaton LA et al. Malignant mixed Müllerian tumor with rhabdoid features: a report of two cases and a review of the literature. *Gynecol Oncol* 1999; 73: 145–150
- 33 Fukunaga M, Nomura K, Endo Y et al. Carcinosarcoma of the uterus with extensive neuroectodermal differentiation. *Histopathology* 1996; 29: 565–570
- 34 Shokeir MO, Noel SM, Clement PB. Malignant müllerian mixed tumor of the uterus with a prominent alpha-fetoprotein-producing component of yolk sac tumor. *Mod Pathol* 1996; 9: 647–651
- 35 Takano M, Shibasaki T, Sato K et al. Malignant mixed Müllerian tumor of the uterine corpus with alpha-fetoprotein-producing hepatoid adenocarcinoma component. *Gynecol Oncol* 2003; 91: 444–448
- 36 Park JY, Kim DY, Kim JH et al. The role of pelvic and/or para-aortic lymphadenectomy in surgical management of apparently early carcinosarcoma of uterus. *Ann Surg Oncol* 2010; 17: 861–868
- 37 Gadducci A, Cosio S, Romanini A et al. The management of patients with uterine sarcoma: a debated clinical challenge. *Crit Rev Oncol Hematol* 2008; 65: 129–142
- 38 Tanner EJ, Leitao MM Jr., Garg K et al. The role of cytoreductive surgery for newly diagnosed advanced-stage uterine carcinosarcoma. *Gynecol Oncol* 2011; 123: 548–552
- 39 Wolfson AH, Brady MF, Rocereto T et al. A gynecologic oncology group randomized phase III trial of whole abdominal irradiation (WAI) vs. cisplatin-ifosfamide and mesna (CIM) as post-surgical therapy in stage I–IV carcinosarcoma (CS) of the uterus. *Gynecol Oncol* 2007; 107: 177–185
- 40 Cantrell LA, Havrilesky L, Moore DT et al. A multi-institutional cohort study of adjuvant therapy in stage I–II uterine carcinosarcoma. *Gynecol Oncol* 2012; 127: 22–26
- 41 Powell MA, Filiaci VL, Rose PG et al. Phase II evaluation of paclitaxel and carboplatin in the treatment of carcinosarcoma of the uterus: a Gynecologic Oncology Group study. *J Clin Oncol* 2010; 28: 2727–2731
- 42 Reed NS, Mangioni C, Malmström H et al.; European Organisation for Research and Treatment of Cancer Gynaecological Cancer Group. Phase III randomised study to evaluate the role of adjuvant pelvic radiotherapy in the treatment of uterine sarcomas stages I and II: an European Organisation for Research and Treatment of Cancer Gynaecological Cancer Group Study (protocol 55874). *Eur J Cancer* 2008; 44: 808–818
- 43 Nam JH. Surgical treatment of uterine sarcoma. *Best Pract Res Clin Obstet Gynaecol* 2011; 25: 751–760
- 44 Sutton G, Brunetto VL, Kilgore L et al. A phase III trial of ifosfamide with or without cisplatin in carcinosarcoma of the uterus: a Gynecologic Oncology Group Study. *Gynecol Oncol* 2000; 79: 147–153
- 45 Galaal K, van der Heijden E, Godfrey K et al. Adjuvant radiotherapy and/or chemotherapy after surgery for uterine carcinosarcoma. *Cochrane Database Syst Rev* 2013; 2: CD006812
- 46 Homesley HD, Filiaci V, Markman M et al.; Gynecologic Oncology Group. Phase III trial of ifosfamide with or without paclitaxel in advanced uterine carcinosarcoma: a Gynecologic Oncology Group Study. *J Clin Oncol* 2007; 25: 526–531
- 47 du Bois A, Burges A, Meier W et al.; Arbeitsgemeinschaft Gynaekologische Onkologie Studiengruppe Ovarialkarzinom. Pegylated liposomal doxorubicin and carboplatin in advanced gynecologic tumors: a prospective phase I/II study of the Arbeitsgemeinschaft Gynaekologische Onkologie Studiengruppe Ovarialkarzinom (AGO-OVAR). *Ann Oncol* 2006; 17: 93–96
- 48 Lacour RA, Euscher E, Atkinson EN et al. A phase II trial of paclitaxel and carboplatin in women with advanced or recurrent uterine carcinosarcoma. *Int J Gynecol Cancer* 2011; 21: 517–522
- 49 Dusenbery KE, Potish RA, Judson P. Limitations of adjuvant radiotherapy for uterine sarcomas spread beyond the uterus. *Gynecol Oncol* 2004; 94: 191–196
- 50 Amant F, Coosemans A, Debiec-Rychter M et al. Clinical management of uterine sarcomas. *Lancet Oncol* 2009; 10: 1188–1198
- 51 Abeler VM, Røyne O, Thoresen S et al. Uterine sarcomas in Norway. A histopathological and prognostic survey of a total population from 1970 to 2000 including 419 patients. *Histopathology* 2009; 54: 355–364
- 52 Pelmus M, Penault-Llorca F, Guillo L et al. Prognostic factors in early-stage leiomyosarcoma of the uterus. *Int J Gynecol Cancer* 2009; 19: 385–390
- 53 Iasonos A, Keung EZ, Zivanovic O et al. External validation of a prognostic nomogram for overall survival in women with uterine leiomyosarcoma. *Cancer* 2013; 119: 1816–1822
- 54 King ME, Dickersin GR, Scully RE. Myxoid leiomyosarcoma of the uterus. A report of six cases. *Am J Surg Pathol* 1982; 6: 589–598
- 55 Coindre JM. Grading and Staging of Sarcoma. In: Fletcher CDM, Bridge JA, Hogendoorn PCW, Mertens F, eds. *WHO Classification of Tumours of soft Tissue and Bone*. Lyon: IARC Press; 2013: 17–18
- 56 Guillo L, Coindre JM, Bonichon F et al. Comparative study of the National Cancer Institute and French Federation of Cancer Centers Sarcoma Group grading systems in a population of 410 adult patients with soft tissue sarcoma. *J Clin Oncol* 1997; 15: 350–362
- 57 Deyrup AT, Weiss SW. Grading of soft tissue sarcomas: the challenge of providing precise information in an imprecise world. *Histopathology* 2006; 48: 42–50
- 58 Coindre JM. Grading of soft tissue sarcomas: review and update. *Arch Pathol Lab Med* 2006; 130: 1448–1453
- 59 Kapp DS, Shin JY, Chan JK. Prognostic factors and survival in 1396 patients with uterine leiomyosarcomas: emphasis on impact of lymphadenectomy and oophorectomy. *Cancer* 2008; 112: 820–830
- 60 Perri T, Korach J, Sadetzki S et al. Uterine leiomyosarcoma: does the primary surgical procedure matter? *Int J Gynecol Cancer* 2009; 19: 257–260
- 61 Leitao MM, Sonoda Y, Brennan MF et al. Incidence of lymph node and ovarian metastases in leiomyosarcoma of the uterus. *Gynecol Oncol* 2003; 91: 209–212
- 62 Pautier P, Floquet A, Gladiéff L et al. A randomized clinical trial of adjuvant chemotherapy with doxorubicin, ifosfamide, and cisplatin followed by radiotherapy versus radiotherapy alone in patients with localized uterine sarcomas (SARCGYN study). A study of the French Sarcoma Group. *Ann Oncol* 2013; 24: 1099–1104
- 63 Hensley ML, Ishill N, Soslow R et al. Adjuvant gemcitabine plus docetaxel for completely resected stages I–IV high grade uterine leiomyosarcoma: results of a prospective study. *Gynecol Oncol* 2009; 112: 563–567
- 64 Hensley ML, Wathen JK, Maki RG et al. Adjuvant therapy for high-grade, uterus-limited leiomyosarcoma: results of a phase 2 trial (SARC005). *Cancer* 2013; 119: 1555–1561
- 65 Bernstein-Molho R, Grisaro D, Soyfer V et al. Metastatic uterine leiomyosarcomas: a single-institution experience. *Int J Gynecol Cancer* 2010; 20: 255–260
- 66 Leitao MM, Brennan MF, Hensley M et al. Surgical resection of pulmonary and extrapulmonary recurrences of uterine leiomyosarcoma. *Gynecol Oncol* 2002; 87: 287–294
- 67 Levenback C et al. Resection of pulmonary metastases from uterine sarcomas. *Gynecol Oncol* 1992; 45: 202–205
- 68 Weiser MR, Downey RJ, Leung DH et al. Repeat resection of pulmonary metastases in patients with soft-tissue sarcoma. *J Am Coll Surg* 2000; 191: 184–190; discussion 190–191
- 69 Giuntoli RL 2nd, Garrett-Mayer E, Bristow RE et al. Secondary cytoreduction in the management of recurrent uterine leiomyosarcoma. *Gynecol Oncol* 2007; 106: 82–88
- 70 Anraku M, Yokoi K, Nakagawa K et al.; Metastatic Lung Tumor Study Group of Japan. Pulmonary metastases from uterine malignancies: results of surgical resection in 133 patients. *J Thorac Cardiovasc Surg* 2004; 127: 1107–1112
- 71 Chen H, Pruitt A, Nicol TL et al. Complete hepatic resection of metastases from leiomyosarcoma prolongs survival. *J Gastrointest Surg* 1998; 2: 151–155
- 72 Maki RG, Wathen JK, Patel SR et al. Randomized phase II study of gemcitabine and docetaxel compared with gemcitabine alone in patients with metastatic soft tissue sarcomas: results of sarcoma alliance for research through collaboration study 002 [corrected]. *J Clin Oncol* 2007; 25: 2755–2763
- 73 Sutton G, Blessing JA, Malfetano JH. Ifosfamide and doxorubicin in the treatment of advanced leiomyosarcomas of the uterus: a Gynecologic Oncology Group study. *Gynecol Oncol* 1996; 62: 226–229
- 74 Hensley ML, Maki R, Venkatraman E et al. Gemcitabine and docetaxel in patients with unresectable leiomyosarcoma: results of a phase II trial. *J Clin Oncol* 2002; 20: 2824–2831
- 75 Gupta AA, Yao X, Verma S et al.; Sarcoma Disease Site Group and the Gynecology Cancer Disease Site Group. Systematic chemotherapy for inoperable, locally advanced, recurrent, or metastatic uterine leiomyosarcoma: a systematic review. *Clin Oncol (R Coll Radiol)* 2013; 25: 346–355

- 76 Sutton GP, Blessing JA, Barrett RJ et al. Phase II trial of ifosfamide and mesna in leiomyosarcoma of the uterus: a Gynecologic Oncology Group study. *Am J Obstet Gynecol* 1992; 166: 556–559
- 77 Look KY, Sandler A, Blessing JA et al.; *Gynecologic Oncology Group (GOG) Study*. Phase II trial of gemcitabine as second-line chemotherapy of uterine leiomyosarcoma: a Gynecologic Oncology Group (GOG) Study. *Gynecol Oncol* 2004; 92: 644–647
- 78 Thigpen T, Blessing JA, Yordan E et al. Phase II trial of etoposide in leiomyosarcoma of the uterus: a Gynecologic Oncology Group study. *Gynecol Oncol* 1996; 63: 120–122
- 79 Rose PG, Blessing JA, Soper JT et al. Prolonged oral etoposide in recurrent or advanced leiomyosarcoma of the uterus: a gynecologic oncology group study. *Gynecol Oncol* 1998; 70: 267–271
- 80 Miller DS, Blessing JA, Kilgore LC et al. Phase II trial of topotecan in patients with advanced, persistent, or recurrent uterine leiomyosarcomas: a Gynecologic Oncology Group Study. *Am J Clin Oncol* 2000; 23: 355–357
- 81 Gallup DG, Blessing JA, Andersen W et al. Evaluation of paclitaxel in previously treated leiomyosarcoma of the uterus: a gynecologic oncology group study. *Gynecol Oncol* 2003; 89: 48–51
- 82 Demetri GD, Chawla SP, von Mehren M et al. Efficacy and safety of trabectedin in patients with advanced or metastatic liposarcoma or leiomyosarcoma after failure of prior anthracyclines and ifosfamide: results of a randomized phase II study of two different schedules. *J Clin Oncol* 2009; 27: 4188–4196
- 83 van der Graaf WT, Blay JY, Chawla SP et al.; *EORTC Soft Tissue and Bone Sarcoma Group; PALETTE study group*. Pazopanib for metastatic soft-tissue sarcoma (PALETTE): a randomised, double-blind, placebo-controlled phase 3 trial. *Lancet* 2012; 379: 1879–1886
- 84 Chew I, Oliva E. Endometrial stromal sarcomas: a review of potential prognostic factors. *Adv Anat Pathol* 2010; 17: 113–121
- 85 Chang KL, Crabtree GS, Lim-Tan SK et al. Primary uterine endometrial stromal neoplasms. A clinicopathologic study of 117 cases. *Am J Surg Pathol* 1990; 14: 415–438
- 86 Barney B, Tward JD, Skidmore T et al. Does radiotherapy or lymphadenectomy improve survival in endometrial stromal sarcoma? *Int J Gynecol Cancer* 2009; 19: 1232–1238
- 87 Einstein MH, Barakat RR, Chi DS et al. Management of uterine malignancy found incidentally after supracervical hysterectomy or uterine morcellation for presumed benign disease. *Int J Gynecol Cancer* 2008; 18: 1065–1070
- 88 Shah JP, Bryant CS, Kumar S et al. Lymphadenectomy and ovarian preservation in low-grade endometrial stromal sarcoma. *Obstet Gynecol* 2008; 112: 1102–1108
- 89 Leath CA 3rd, Huh WK, Hyde J jr. et al. A multi-institutional review of outcomes of endometrial stromal sarcoma. *Gynecol Oncol* 2007; 105: 630–634
- 90 Sampath S, Schultheiss TE, Ryu JK et al. The role of adjuvant radiation in uterine sarcomas. *Int J Radiat Oncol Biol Phys* 2010; 76: 728–734
- 91 Piver MS, Rutledge FN, Copeland L et al. Uterine endolymphatic stromal myosis: a collaborative study. *Obstet Gynecol* 1984; 64: 173–178
- 92 Weitmann HD, Knocke TH, Kucera H et al. Radiation therapy in the treatment of endometrial stromal sarcoma. *Int J Radiat Oncol Biol Phys* 2001; 49: 739–748
- 93 Kortmann B, Reimer T, Gerber B et al. Concurrent radiochemotherapy of locally recurrent or advanced sarcomas of the uterus. *Strahlenther Onkol* 2006; 182: 318–324
- 94 Cheng X, Yang G, Schmeier KM et al. Recurrence patterns and prognosis of endometrial stromal sarcoma and the potential of tyrosine kinase-inhibiting therapy. *Gynecol Oncol* 2011; 121: 323–327
- 95 Dahhan T, Fons G, Buist MR et al. The efficacy of hormonal treatment for residual or recurrent low-grade endometrial stromal sarcoma. A retrospective study. *Eur J Obstet Gynecol Reprod Biol* 2009; 144: 80–84
- 96 Malouf FC, Sabbatini P, Schwartz L et al. Endometrial stromal sarcoma: objective response to letrozole. *Gynecol Oncol* 2001; 82: 384–388
- 97 Pink D, Lindner T, Mrozek A et al. Harm or benefit of hormonal treatment in metastatic low-grade endometrial stromal sarcoma: single center experience with 10 cases and review of the literature. *Gynecol Oncol* 2006; 101: 464–469
- 98 Harter P, Canzler U, Lueck H et al. Pegylated liposomal doxorubicin and carboplatin in malignant mixed epithelial mesenchymal and mesenchymal gynecologic tumors: A phase II trial of the AGO study group. *J Clin Oncol* 2011; 29 (Suppl.): Abstr. 5093
- 99 du Bois A, Pfisterer J, Burchardi N et al.; *Arbeitsgemeinschaft Gynäkologische Onkologie Studiengruppe Ovarialkarzinom; Kommission Uterus*. Combination therapy with pegylated liposomal doxorubicin and carboplatin in gynecologic malignancies: a prospective phase II study of the Arbeitsgemeinschaft Gynäkologische Onkologie Studiengruppe Ovarialkarzinom (AGO-OVAR) and Kommission Uterus (AGO-K-Ut). *Gynecol Oncol* 2007; 107: 518–525
- 100 Malouf GG, Lhommé C, Duvillard P et al. Prognostic factors and outcome of undifferentiated endometrial sarcoma treated by multimodal therapy. *Int J Gynaecol Obstet* 2013; 122: 57–61
- 101 Tanner EJ, Garg K, Leitao MM jr. et al. High grade undifferentiated uterine sarcoma: surgery, treatment, and survival outcomes. *Gynecol Oncol* 2012; 127: 27–31
- 102 Schick U, Bolukbasi Y, Thariat J et al. Outcome and prognostic factors in endometrial stromal tumors: a Rare Cancer Network study. *Int J Radiat Oncol Biol Phys* 2012; 82: e757–e763
- 103 Oliva E. Cellular mesenchymal tumors of the uterus: a review emphasizing recent observations. *Int J Gynecol Pathol* 2014; 33: 374–384
- 104 Hendrickson MA, Tavassoli FA, Kempson RL, McCluggage WG, Haller U, Kubik-Huch RA. Mesenchymal Tumors and related Lesions. In: Tavassoli FA, Devilee P, eds. *Pathology and Genetics of Tumours of the Breast and female genital Organs. World Health Organization Classification of Tumours*. Lyon: IARC Press; 2003: 233–249
- 105 Fleming NA, Hopkins L, de Nanassy J et al. Mullerian adenosarcoma of the cervix in a 10-year-old girl: case report and review of the literature. *J Pediatr Adolesc Gynecol* 2009; 22: e45–e51
- 106 Clement PB, Scully RE. Mullerian adenosarcoma of the uterus: a clinicopathologic analysis of 100 cases with a review of the literature. *Hum Pathol* 1990; 21: 363–381
- 107 Arend R, Bagaria M, Lewin SN et al. Long-term outcome and natural history of uterine adenosarcomas. *Gynecol Oncol* 2010; 119: 305–308
- 108 McCluggage WG. Mullerian adenosarcoma of the female genital tract. *Adv Anat Pathol* 2010; 17: 122–129
- 109 Wells M, Oliva E, Palacios J, Prat J. Mixed epithelial and mesenchymal Tumors of the Uterus. In: Kurman RJ, Carcangiu ML, Herrington CS, Young RH, eds. *WHO Classification of Tumours of female reproductive Tract*. Lyon: IARC Press; 2014: 148–151
- 110 Tanner EJ, Toussaint T, Leitao MM jr. et al. Management of uterine adenosarcomas with and without sarcomatous overgrowth. *Gynecol Oncol* 2013; 129: 140–144
- 111 Beckmann MW, Juhasz-Böss I, Denschlag D et al. Surgical methods for the treatment of uterine fibroids – risk of uterine sarcoma and problems of morcellation: position paper of the DGGG. *Geburtsh Frauenheilk* 2015; 75: 148–164
- 112 Chan JK, Kavar NM, Shin JY et al. Endometrial stromal sarcoma: a population-based analysis. *Br J Cancer* 2008; 99: 1210–1215
- 113 Bai H, Yang J, Cao D et al. Ovary and uterus-sparing procedures for low-grade endometrial stromal sarcoma: a retrospective study of 153 cases. *Gynecol Oncol* 2014; 132: 654–660
- 114 Amant F, De Knijf A, Van Calster B et al. Clinical study investigating the role of lymphadenectomy, surgical castration and adjuvant hormonal treatment in endometrial stromal sarcoma. *Br J Cancer* 2007; 97: 1194–1199
- 115 Beck TL, Singhal PK, Ehrenberg HM et al. Endometrial stromal sarcoma: analysis of recurrence following adjuvant treatment. *Gynecol Oncol* 2012; 125: 141–144
- 116 Chu MC, Mor G, Lim C et al. Low-grade endometrial stromal sarcoma: hormonal aspects. *Gynecol Oncol* 2003; 90: 170–176

## Statements und Empfehlungen

### 2.1 Inzidenz, Tumortypisierung bzw. Klassifikation und Stadieneinteilung

Uterine Sarkome sind eine heterogene Gruppe insgesamt seltener Malignome (1,5–3/100 000) der Uterusmuskulatur, des endometrialen Stromas oder des uterinen Bindegewebes.

Der Terminologie und der morphologischen Diagnostik uteriner Sarkome soll die jeweils gültige Auflage der WHO-Klassifikation zugrunde gelegt werden.

Der postoperativen Stadieneinteilung uteriner Sarkome soll die jeweils gültige pTNM-Klassifikation und FIGO-Klassifikation zugrunde gelegt werden.

### 2.2 Diagnostik

Es gibt keine spezifischen Symptome für uterine Sarkome.

Die vaginale Ultraschalluntersuchung ist die Methode der Wahl im Rahmen der bildgebenden Diagnostik bei Verdacht auf Vorliegen eines uterinen Sarkoms.

Bildgebende Verfahren oder diagnostische Operationen können ein uterines Sarkom nicht ausschließen.

Bei histologisch nachgewiesenem uterinen Sarkom sollte aufgrund des hohen Metastasierungspotenzials eine Computertomografie von Thorax und Abdomen erfolgen.

Die Patientin mit der Diagnose eines uterinen Sarkoms sollte in einer interdisziplinären Tumorkonferenz vorgestellt werden.

### 3 Karzinosarkom

Im Frühstadium sollen die komplette Entfernung des Uterus ohne Morcellement und eine Adnexektirpation bds. erfolgen.

Darüber hinaus sollte eine systematische pelvine und paraaortale Lymphadenektomie erfolgen.

Beim Karzinosarkom kann eine adjuvante Chemotherapie durchgeführt werden.

Zur Verbesserung der lokalen Kontrolle sollte beim Karzinosarkom eine postoperative Radiotherapie beim Vorliegen eines Stadiums FIGO I oder II durchgeführt werden.

### 4 Leiomyosarkom

Im Frühstadium sollen die komplette Entfernung des Uterus ohne Morcellement und eine Adnexektirpation bds. erfolgen.

Bei prämenopausalen Patientinnen können die Ovarien belassen werden.

Eine systematische pelvine und paraaortale Lymphadenektomie sollte bei diagnostisch unauffälligen LK nicht durchgeführt werden.

Eine adjuvante Chemotherapie sollte nicht generell durchgeführt, kann aber in Abhängigkeit von Risikofaktoren (z. B. höheres Tumorstadium) individuell diskutiert werden.

Eine Strahlentherapie nach Komplettresektion eines LMS im Stadium I/II sollte nicht durchgeführt werden.

Im Falle eines Rezidivs bzw. bei isolierten Metastasen sollte geprüft werden, ob operative bzw. lokaltherapeutische Maßnahmen indiziert sind.

### 5 Low-Grade endometriales Stromasarkom

Im Frühstadium sollen die komplette Entfernung des Uterus ohne Morcellement und eine Adnexektirpation bds. erfolgen.

Eine systematische pelvine und paraaortale Lymphadenektomie sollte bei diagnostisch unauffälligen LK nicht durchgeführt werden.

Eine adjuvante endokrine Therapie sollte nicht generell durchgeführt, kann aber in Abhängigkeit von Risikofaktoren (z. B. höheres Tumorstadium) individuell diskutiert werden.

Eine adjuvante Chemotherapie sollte nicht durchgeführt werden.

Eine adjuvante Strahlentherapie sollte nach Komplettresektion nicht durchgeführt werden.

Im Falle eines Rezidivs bzw. bei isolierten Metastasen sollte geprüft werden, ob operative bzw. lokaltherapeutische Maßnahmen indiziert sind.

Es gibt keine Daten zur onkologischen Sicherheit des Einsatzes einer Hormonersatztherapie nach durchgeführter Primärbehandlung eines Low-Grade ESS. Aufgrund der Tumorbiologie des Low-Grade ESS mit hoher Östrogenabhängigkeit sollte von einer Hormonersatztherapie abgeraten werden.

### 6 High-Grade endometriales Stromasarkom und undifferenziertes uterines Sarkom

Im Frühstadium sollen die komplette Entfernung des Uterus ohne Morcellement und eine Adnexektirpation bds. erfolgen.

Eine systematische pelvine und paraaortale Lymphadenektomie sollte bei diagnostisch unauffälligen LK nicht durchgeführt werden.

Eine adjuvante Therapie kann durchgeführt werden.

### 8 Nachsorge

In den ersten 2–3 Jahren nach Primärtherapie sollte eine regelmäßige Nachsorge alle 3 Monate mit SpekulumEinstellung, vaginaler und rektaler Untersuchung und gegebenenfalls Ultraschall erfolgen.

Eine weiterführende bildgebende Diagnostik zur Früherkennung von Metastasen kann sinnvoll sein.

### 10 Patientinnenaufklärung

Den Patientinnen soll angeboten werden, den Partner/die Partnerin oder Angehörige in das Gespräch bzw. die Gespräche einzubeziehen.

Die Patientin soll auf die Möglichkeit, Selbsthilfegruppen zu kontaktieren, hingewiesen werden.

Der Patientin sollte eine psychosoziale und psychoonkologische Unterstützung bei psychischen, sexuellen oder partnerschaftlichen Problemen angeboten werden.

## Leitlinienprogramm

### Herausgeber

Federführende Fachgesellschaften

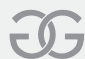

#### Deutsche Gesellschaft für Gynäkologie und Geburtshilfe e. V. (DGGG)

Repräsentanz der DGGG und Fachgesellschaften  
Hausvogteiplatz 12  
DE-10117 Berlin  
info@dggg.de  
<http://www.dggg.de/>

#### Präsident der DGGG

Prof. Dr. med. Diethelm Wallwiener  
Universitätsfrauenklinik Tübingen  
Calwerstraße 7  
DE-72076 Tübingen

#### DGGG-Leitlinienbeauftragter

Prof. Dr. med. Matthias W. Beckmann  
Universitätsklinikum Erlangen-Nürnberg  
Frauenklinik  
Universitätsstraße 21–23  
DE-91054 Erlangen

#### Leitlinienkoordination

Dr. med. Paul Gaß, Tobias Brodkorb, Marion Gebhardt  
Universitätsklinikum Erlangen-Nürnberg  
Frauenklinik  
Universitätsstraße 21–23  
DE-91054 Erlangen  
fk-dggg-leitlinien@uk-erlangen.de  
<http://www.dggg.de/leitlinienstellungnahmen>

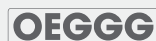

#### Österreichische Gesellschaft für Gynäkologie und Geburtshilfe (OEGGG)

Innrain 66A/5. Stock  
AT-6020 Innsbruck  
stephanie.leutgeb@oeggg.at  
<http://www.oeggg.at>

#### Präsident der OEGGG

Prof. Dr. med. Uwe Lang  
Universitätsklinik für Frauenheilkunde und Geburtshilfe Graz  
Auenbruggerplatz 14  
AT-8036 Graz

#### OEGGG-Leitlinienbeauftragter

Prof. Dr. med. Karl Tamussino  
Universitätsklinik für Frauenheilkunde und Geburtshilfe Graz  
Auenbruggerplatz 14  
AT-8036 Graz

#### **gynécologie suisse**

#### Schweizerische Gesellschaft für Gynäkologie und Geburtshilfe (SGGG)

Gynécologie Suisse SGGG  
Altenbergstraße 29  
Postfach 6  
CH-3000 Bern 8  
sekretariat@sggg.ch  
<http://www.sggg.ch/>

#### Präsident der SGGG

Dr. med. David Ehm  
FMH für Geburtshilfe und Gynäkologie  
Nägeligasse 13  
CH-3011 Bern

#### SGGG-Leitlinienbeauftragter

Prof. Dr. med. Daniel Surbek  
Universitätsklinik für Frauenheilkunde  
Geburtshilfe und fetomaternal Medizin  
Inselspital Bern  
Effingerstraße 102  
CH-3010 Bern
